# Supplementary material for: Tumor-targeted glutathione oxidation catalysis with ruthenium nanoreactors against hypoxic osteosarcoma
Source: PubMed Central journal article supplement (PMC11526146; doi:10.1038/s41467-024-53646-y), 2024-10-31
Supplement: 41467_2024_53646_MOESM1_ESM.pdf [file 41467_2024_53646_MOESM1_ESM.pdf]

# Supplementary Information

## Tumor-Targeted Glutathione Oxidation Catalysis with Ruthenium Nanoreactors against Hypoxic Osteosarcoma

Hanchen Zhang<sup>[1,2]</sup>, Nicolás Montesdeoca<sup>[3]</sup>, Dongsheng Tang<sup>[1,2]</sup>, Ganghao Liang<sup>[1,2]</sup> Minhui Cui<sup>[1,2]</sup>, Chun Xu<sup>[4]</sup>, Lisa-Marie Servos<sup>[3]</sup>, Tiejun Bing,<sup>[5]</sup> Zisis Papadopoulos<sup>[3]</sup>, Meifang Shen,<sup>[6]</sup> Haihua Xiao\*<sup>[1,2]</sup>, Yingjie Yu\*<sup>[6]</sup> and Johannes Karges\*<sup>[3]</sup>

- [1] Beijing National Laboratory for Molecular Sciences, Laboratory of Polymer Physics and Chemistry, Institute of Chemistry, Chinese Academy of Sciences, Beijing, 100190, China
- [2] University of Chinese Academy of Sciences, Beijing 100049, China
- [3] Faculty of Chemistry and Biochemistry, Ruhr-University Bochum, Universitätsstrasse 150, 44780 Bochum, Germany
- [4] School of Dentistry, The University of Queensland, Brisbane, Queensland, Australia
- [5] Immunology and Oncology center, ICE Bioscience, Beijing 100176, China
- [6] State Key Laboratory of Organic-Inorganic Composites, Beijing Laboratory of Biomedical Materials, Beijing University of Chemical Technology, Beijing, 100029, China

## Table of Contents

|                               |    |
|-------------------------------|----|
| Supplementary Figure 1 .....  | 1  |
| Supplementary Figure 2 .....  | 2  |
| Supplementary Figure 3 .....  | 3  |
| Supplementary Figure 4 .....  | 4  |
| Supplementary Figure 5 .....  | 5  |
| Supplementary Figure 6 .....  | 6  |
| Supplementary Figure 7 .....  | 7  |
| Supplementary Figure 8 .....  | 8  |
| Supplementary Figure 9 .....  | 9  |
| Supplementary Figure 10 ..... | 10 |
| Supplementary Figure 11 ..... | 11 |
| Supplementary Figure 12 ..... | 12 |
| Supplementary Figure 13 ..... | 13 |
| Supplementary Figure 14 ..... | 14 |
| Supplementary Figure 15 ..... | 15 |
| Supplementary Figure 16 ..... | 16 |
| Supplementary Figure 17 ..... | 17 |
| Supplementary Figure 18 ..... | 18 |
| Supplementary Figure 19 ..... | 10 |
| Supplementary Figure 20 ..... | 20 |
| Supplementary Figure 21 ..... | 21 |
| Supplementary Figure 22 ..... | 22 |
| Supplementary Figure 23 ..... | 23 |
| Supplementary Figure 24 ..... | 24 |
| Supplementary Figure 25 ..... | 25 |
| Supplementary Figure 26 ..... | 26 |
| Supplementary Figure 27 ..... | 27 |

|                               |    |
|-------------------------------|----|
| Supplementary Figure 28 ..... | 28 |
| Supplementary Figure 29 ..... | 29 |
| Supplementary Figure 30 ..... | 30 |
| Supplementary Figure 31 ..... | 31 |
| Supplementary Figure 32 ..... | 32 |
| Supplementary Figure 33 ..... | 33 |
| Supplementary Figure 34 ..... | 34 |
| Supplementary Figure 35 ..... | 35 |
| Supplementary Figure 36 ..... | 36 |
| Supplementary Figure 37 ..... | 37 |
| Supplementary Figure 38 ..... | 38 |
| Supplementary Figure 39 ..... | 39 |
| Supplementary Figure 40 ..... | 40 |
| Supplementary Figure 41 ..... | 41 |
| Supplementary Figure 42 ..... | 42 |
| Supplementary Table 1.....    | 43 |
| Supplementary Table 2.....    | 44 |
| Supplementary Table 3.....    | 45 |
| Supplementary Table 4.....    | 47 |
| Supplementary Table 5.....    | 50 |
| Supplementary Table 6.....    | 54 |

## Supplementary Figures and Tables

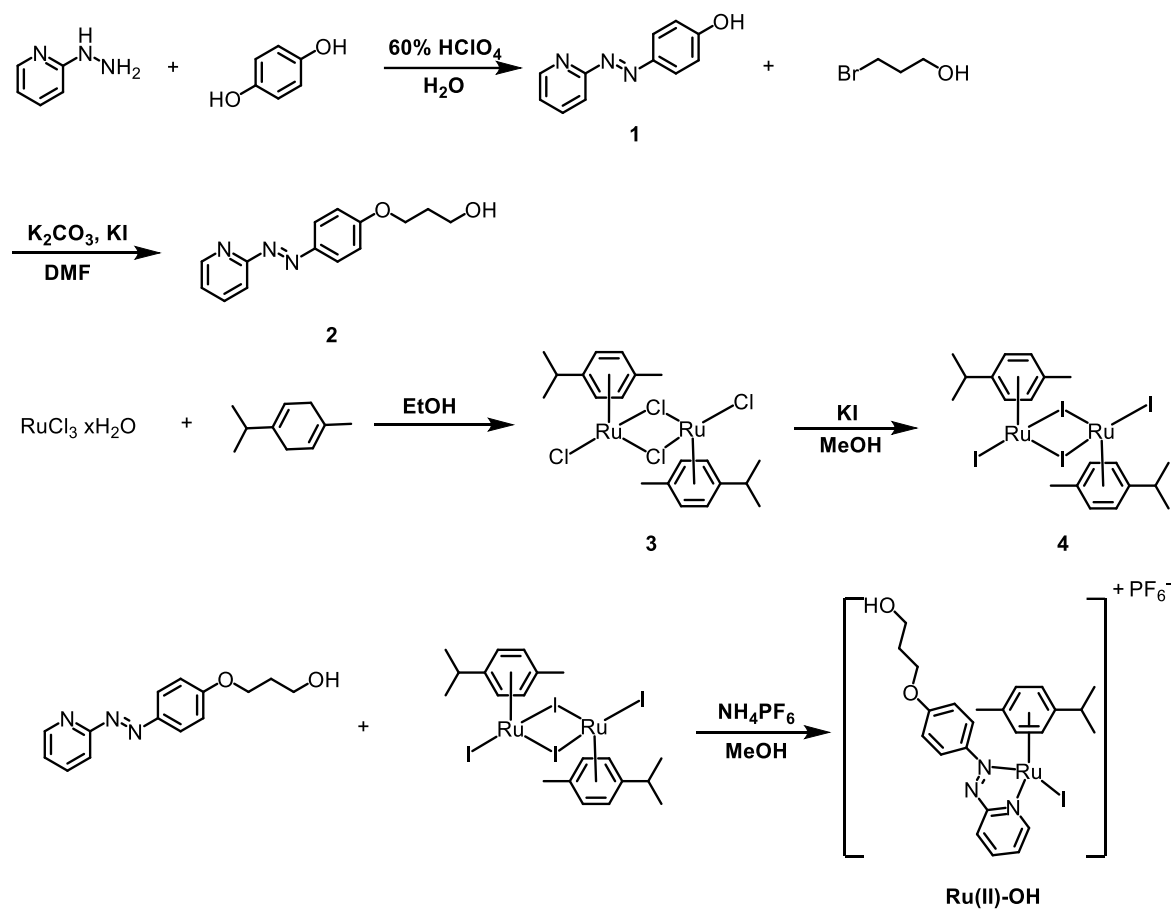

Supplementary Figure 1. Synthetic route for the ruthenium (Ru) arene complex (Ru(II)-OH).

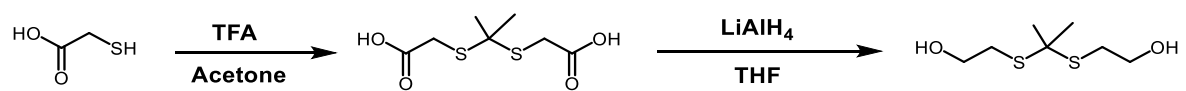

**Supplementary Figure 2.** Synthetic route for 2,2'-(propane-2,2-diylbis(sulfanediy))bis(ethan-1-ol).

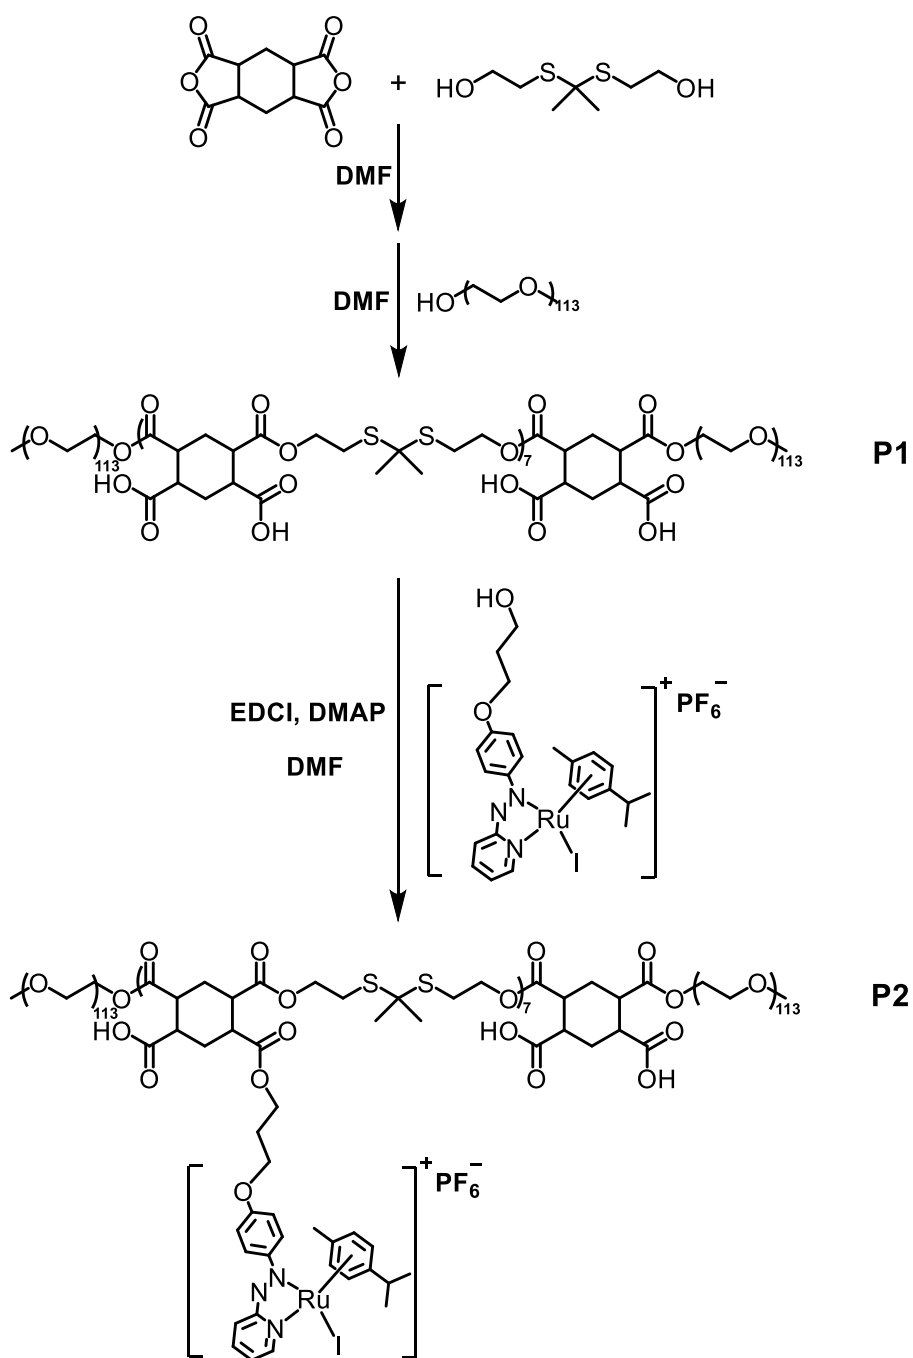

**Supplementary Figure 3.** Synthetic route for P1 and P2.

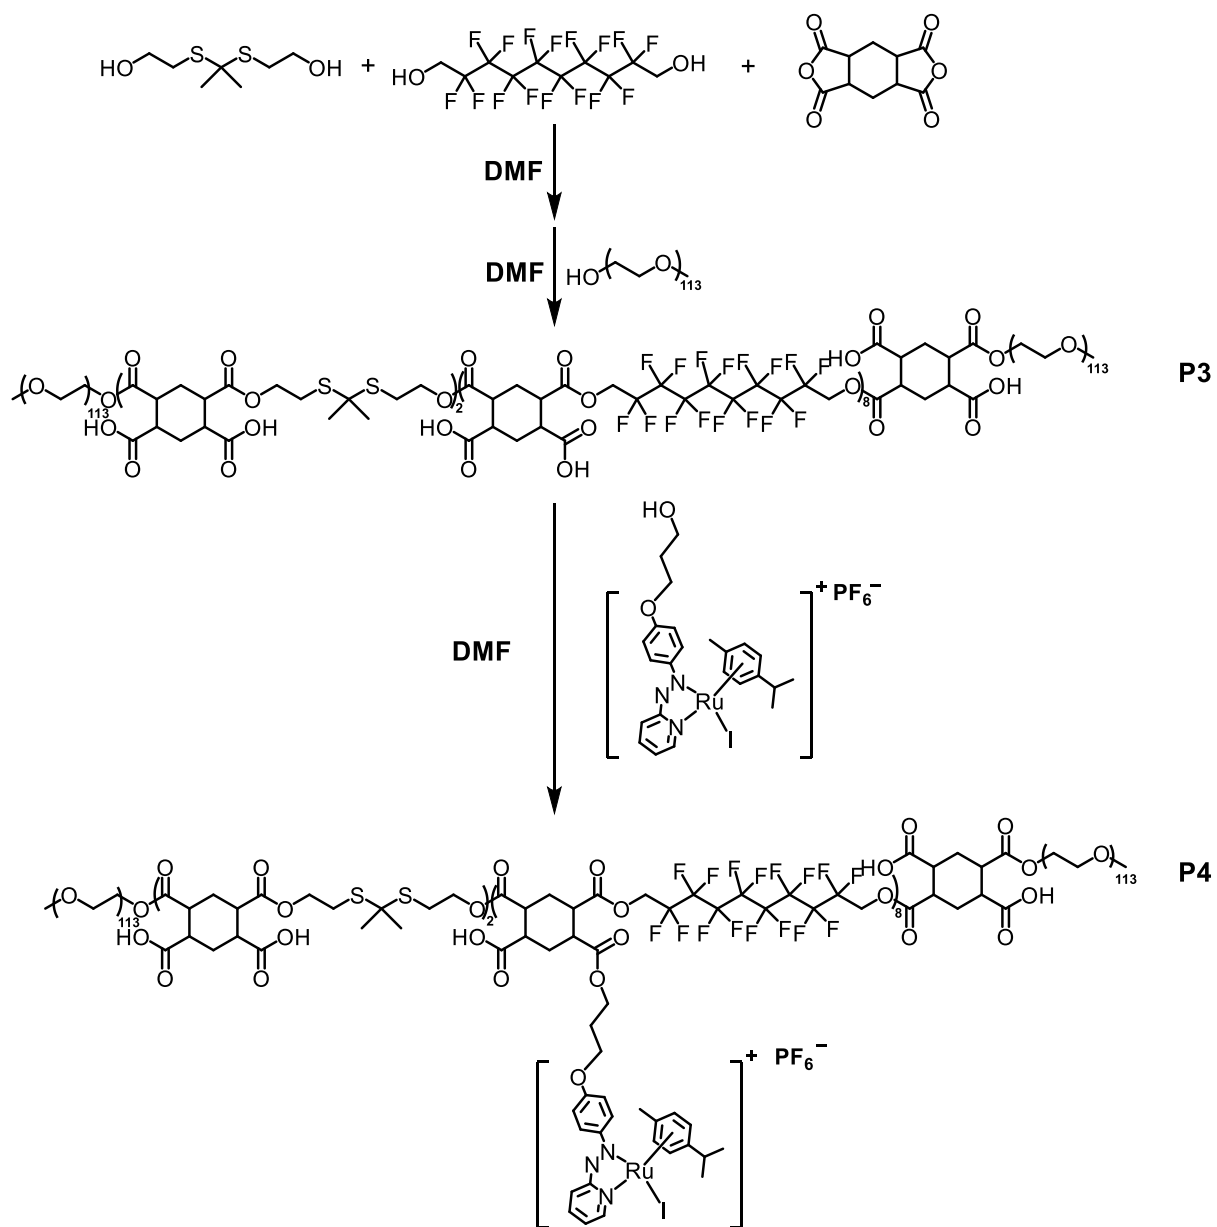

**Supplementary Figure 4.** Synthetic route for P3 and P4.

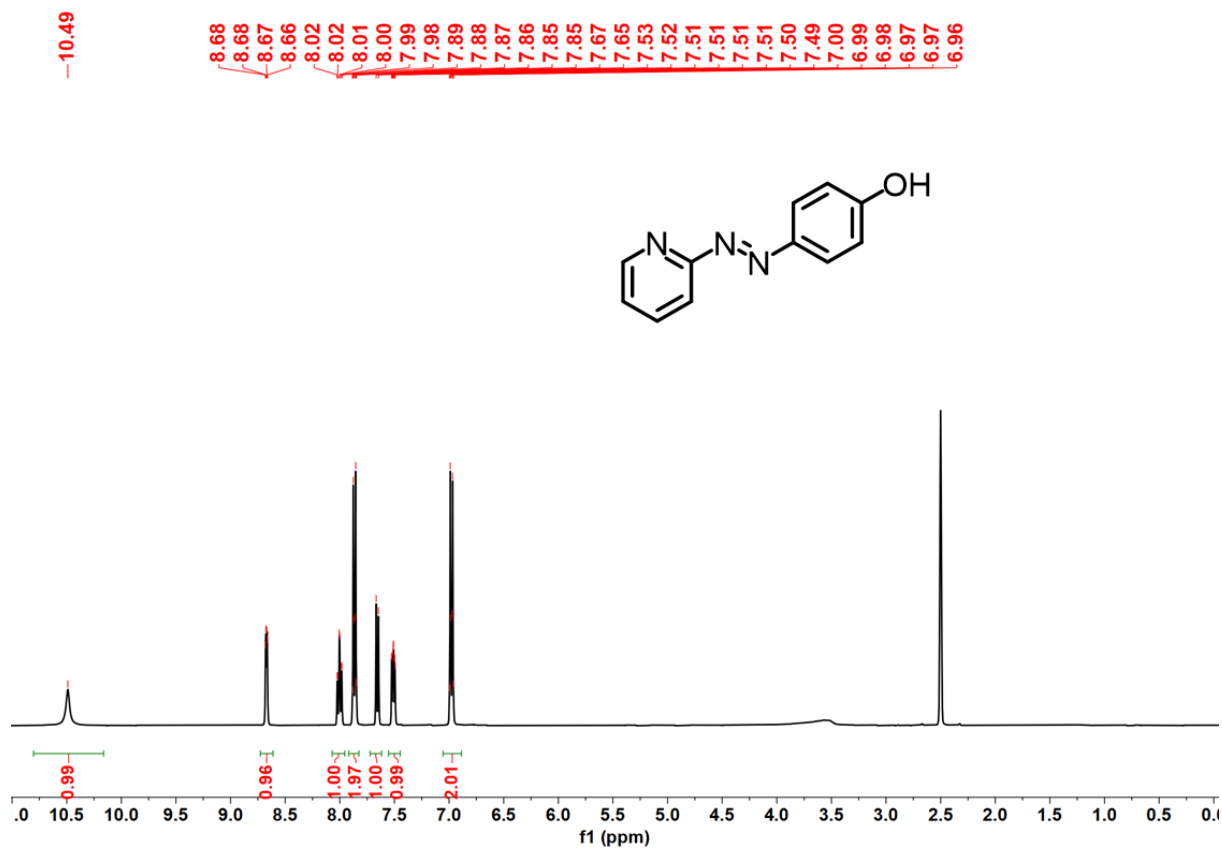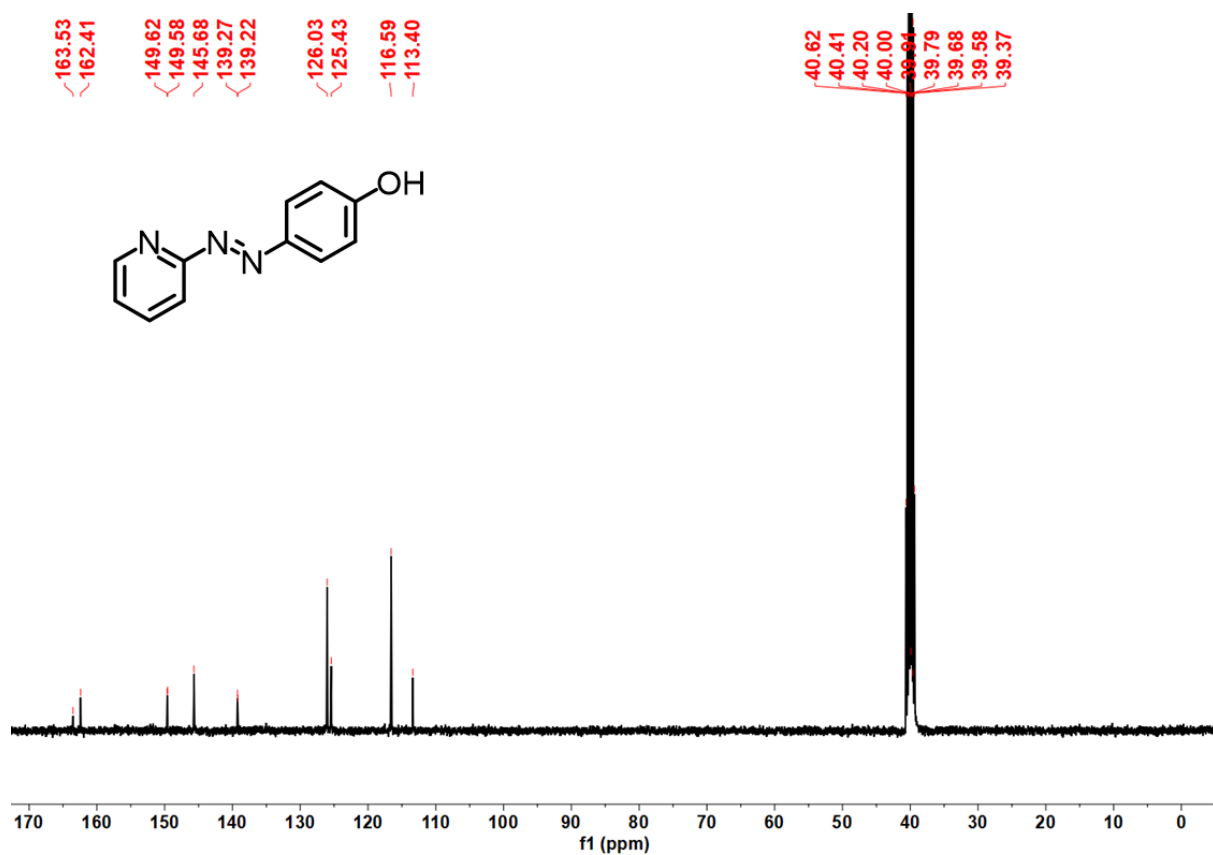

**Supplementary Figure 5.** <sup>1</sup>H-NMR and <sup>13</sup>C-NMR spectrums of 4-(pyridin-2-yl)diazenylphenol in DMSO-*d*<sub>6</sub>.



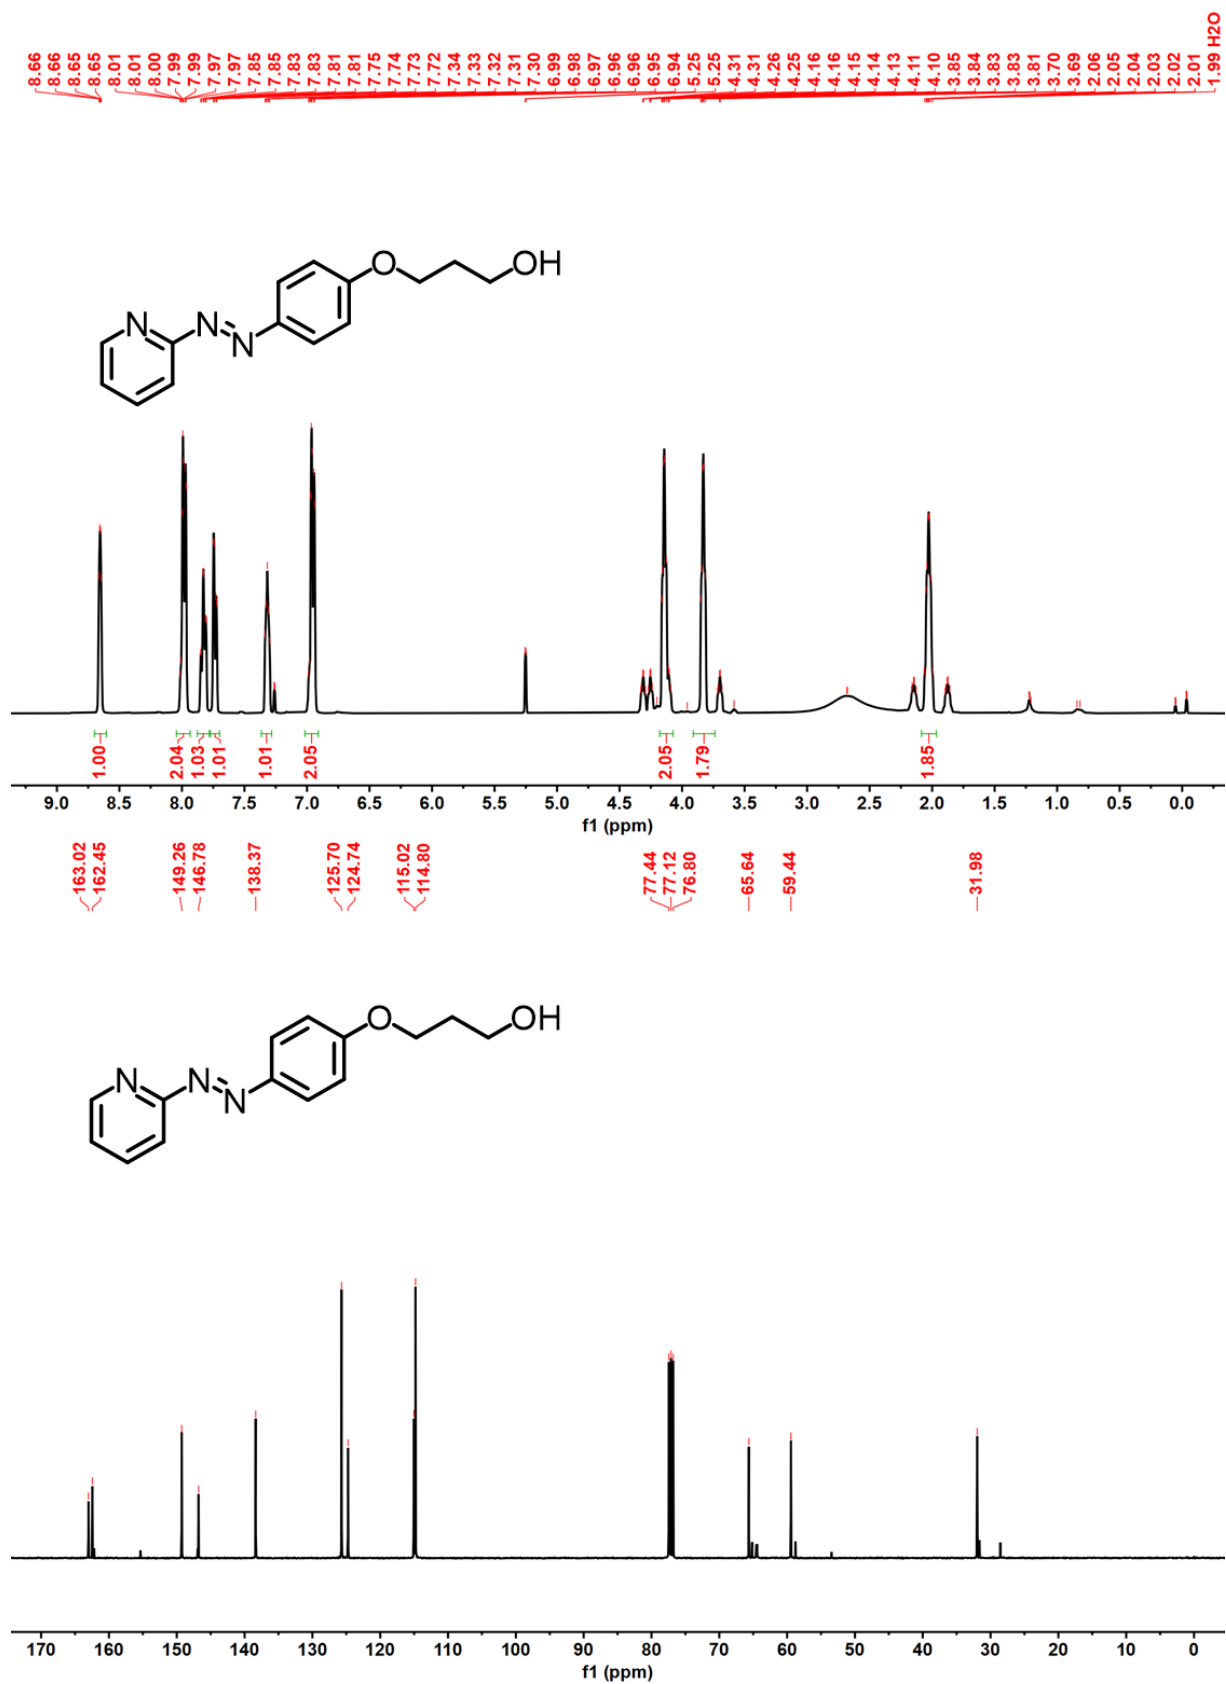

**Supplementary Figure 6.** <sup>1</sup>H-NMR and <sup>13</sup>C-NMR spectrums of 3-(4-(pyridin-2-ylidiazenyl)phenoxy)propan-1-ol in MeOH-d<sub>4</sub>.

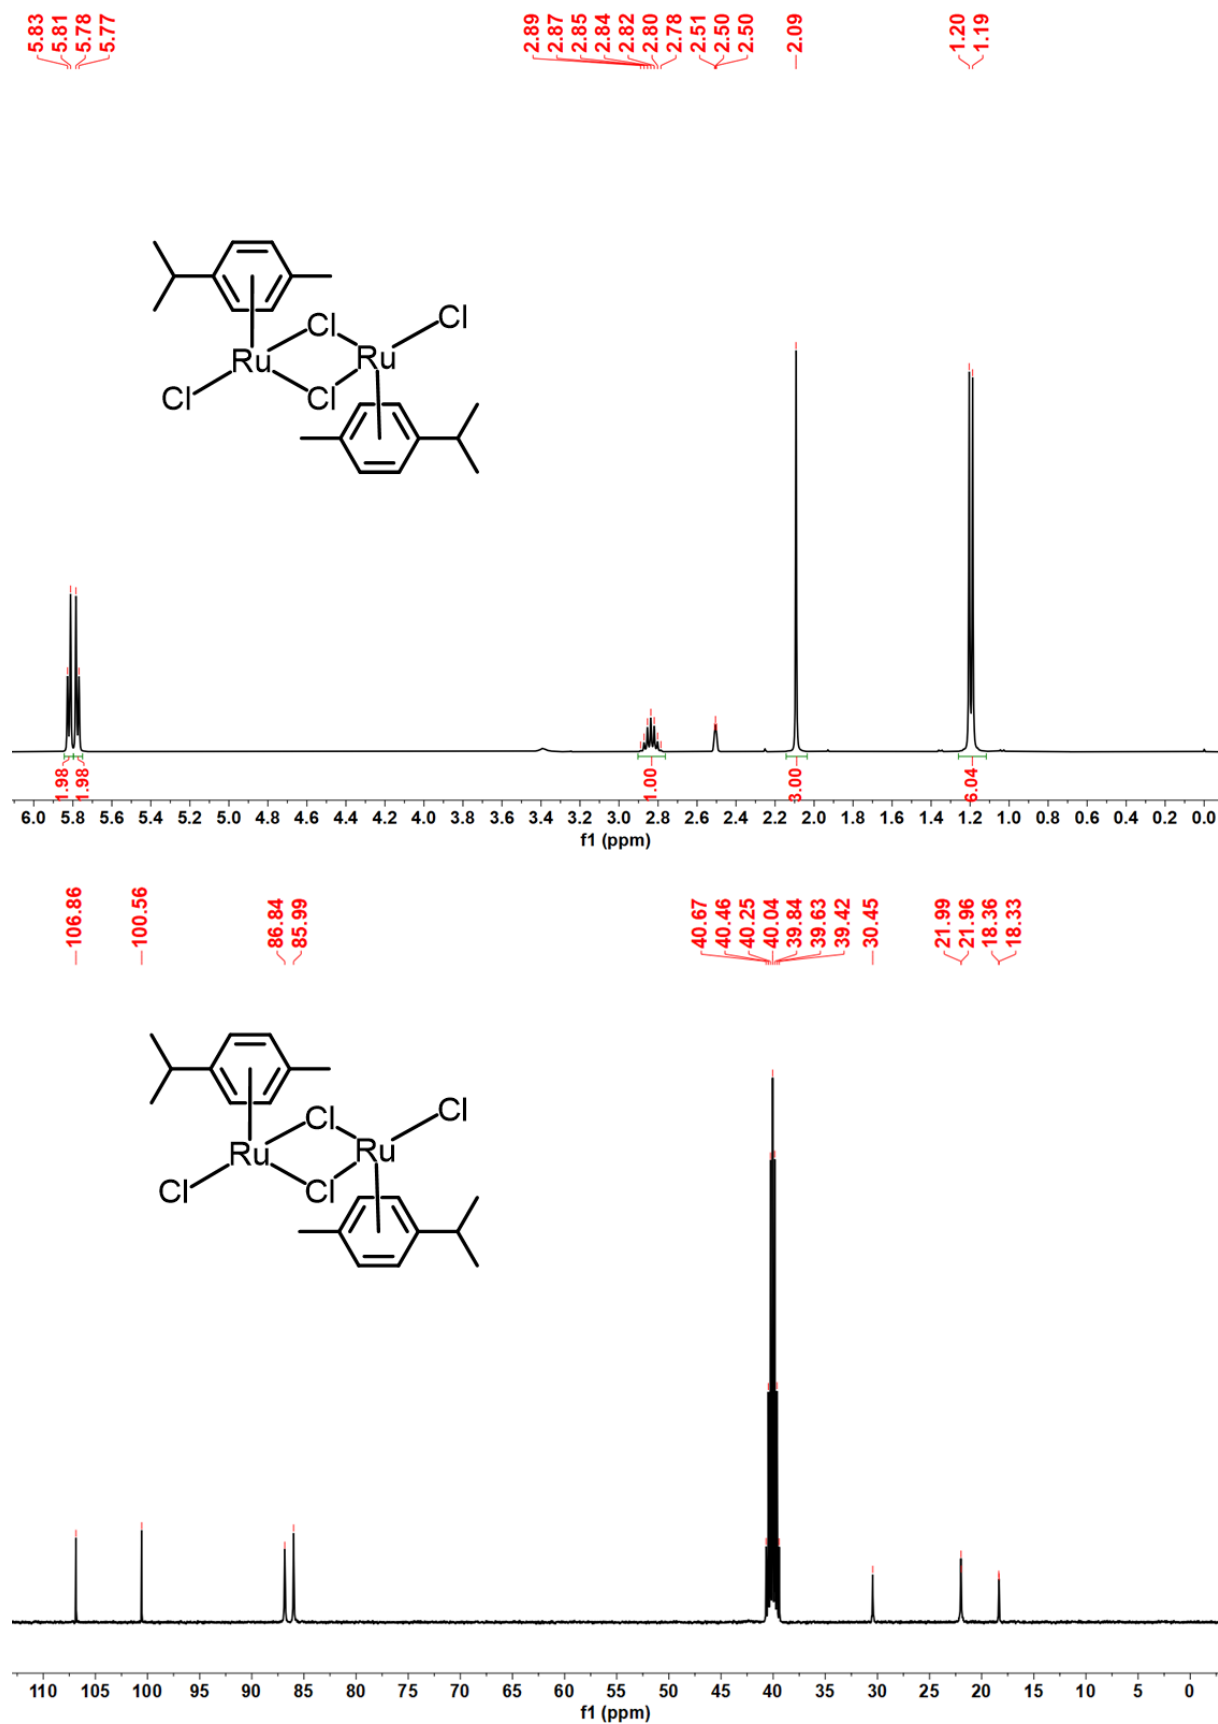

**Supplementary Figure 7.** <sup>1</sup>H-NMR and <sup>13</sup>C-NMR spectra of dichloro(p-cymene)ruthenium(II) dimer in DMSO-d<sub>6</sub>.

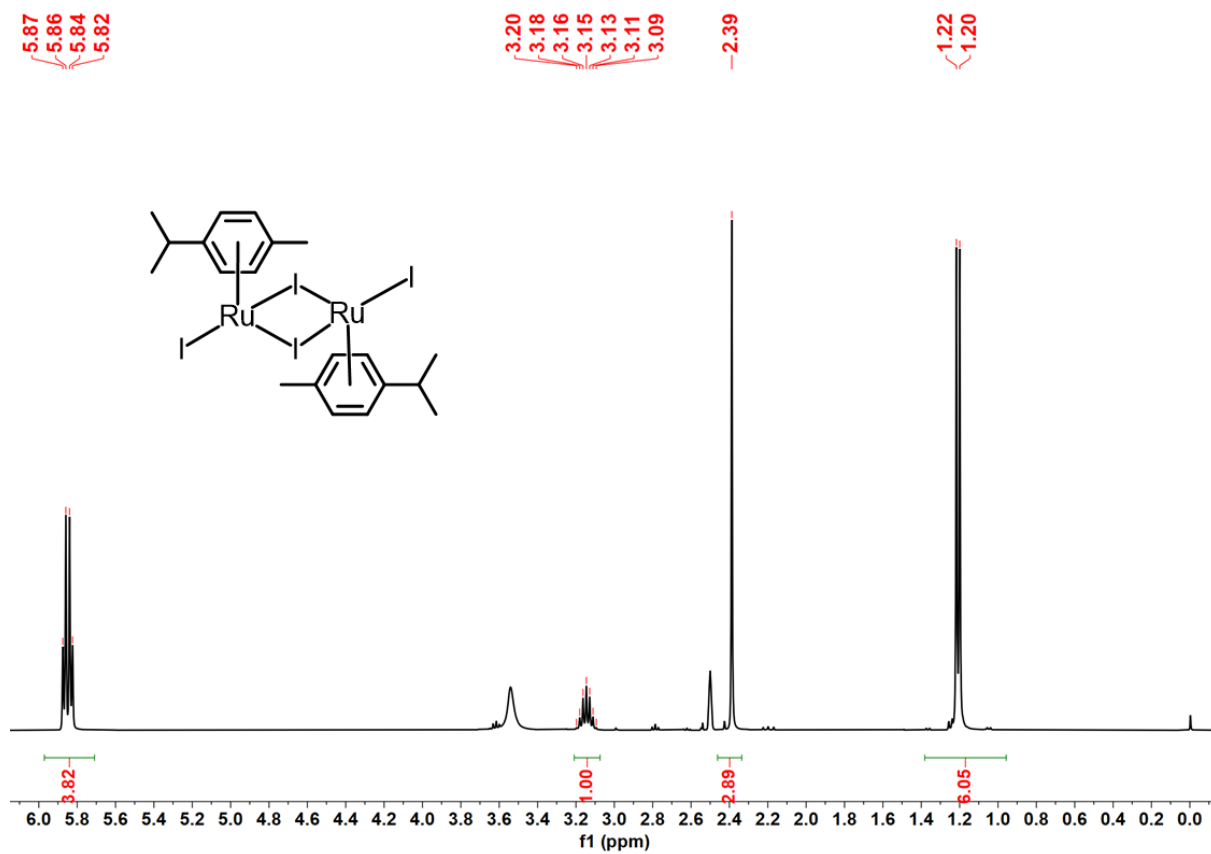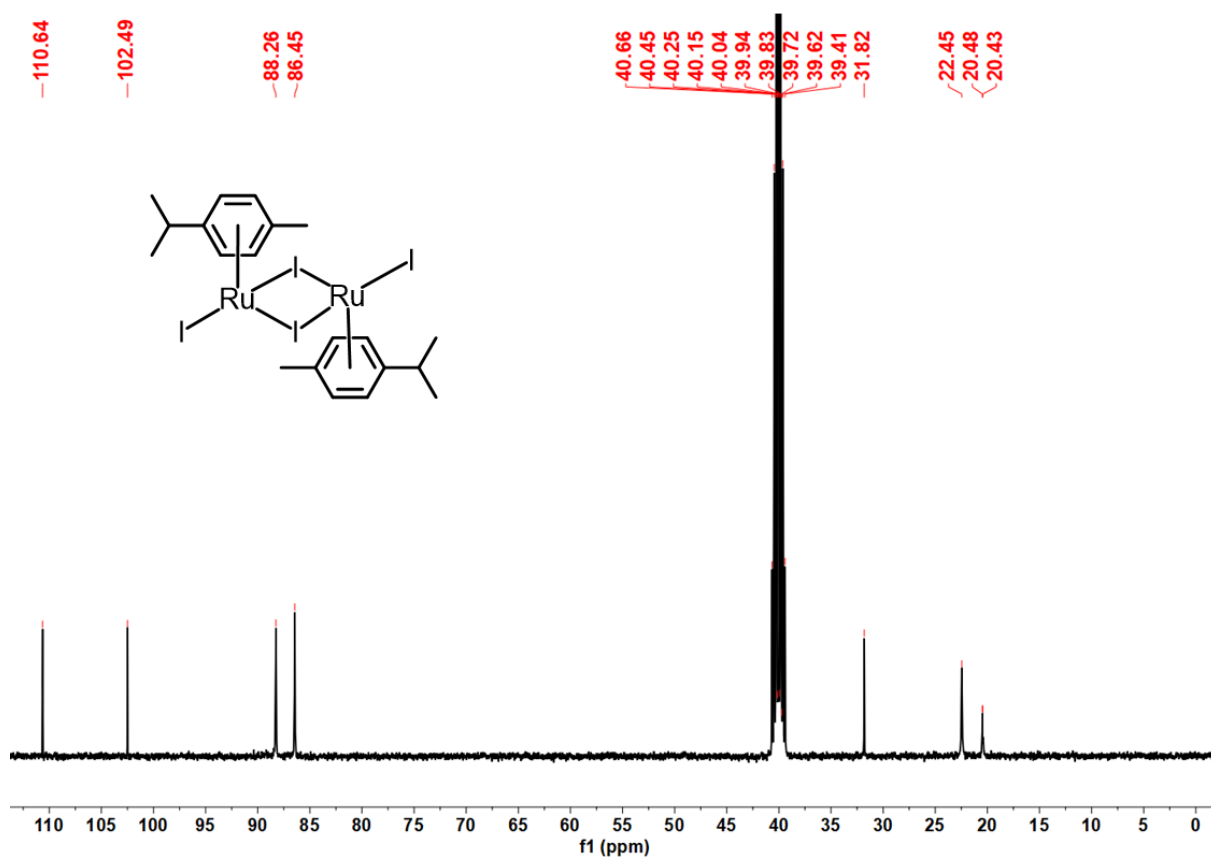

**Supplementary Figure 8.** <sup>1</sup>H-NMR and <sup>13</sup>C-NMR spectrums of diiodo(p-cymene)ruthenium(II) dimer in DMSO-d<sub>6</sub>.

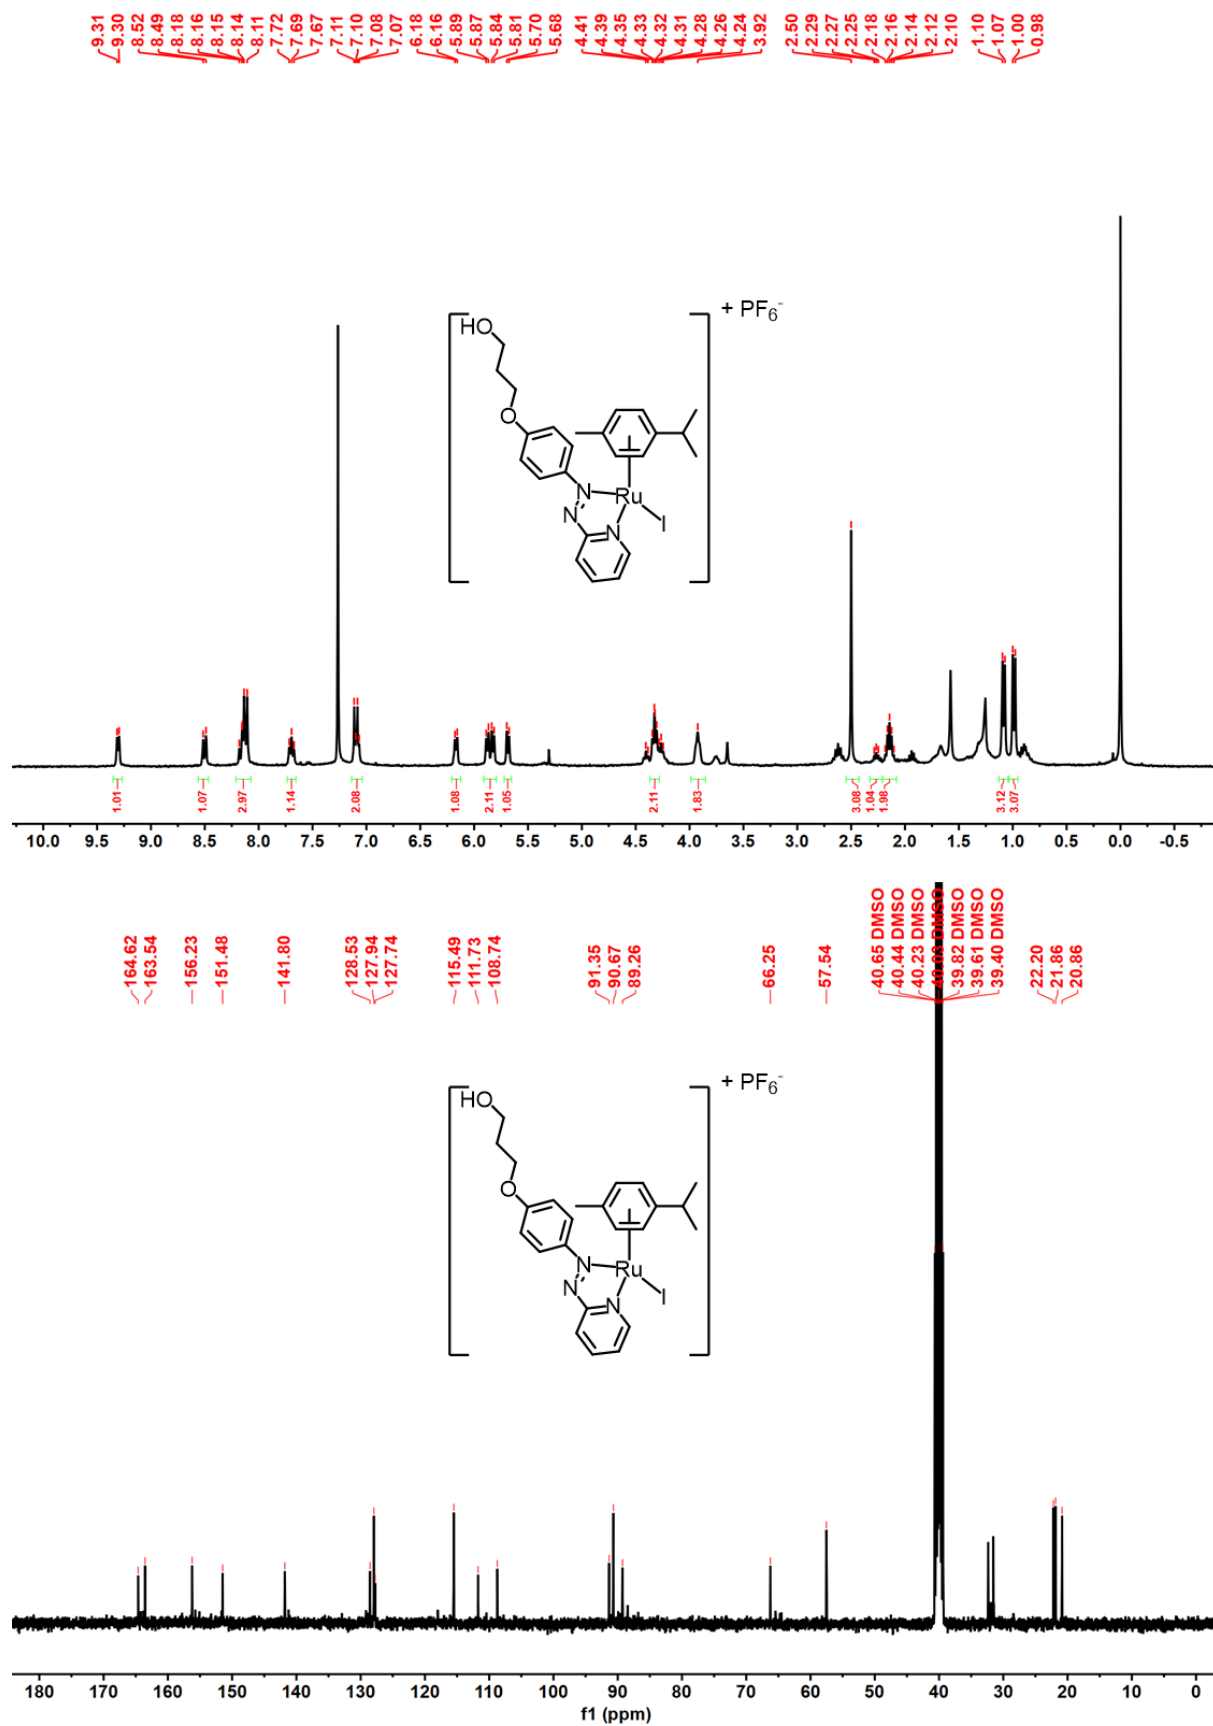

Supplementary Figure 9. <sup>1</sup>H-NMR and <sup>13</sup>C-NMR spectra of Ru(II)-OH in CD<sub>3</sub>Cl-*d*<sub>3</sub>.

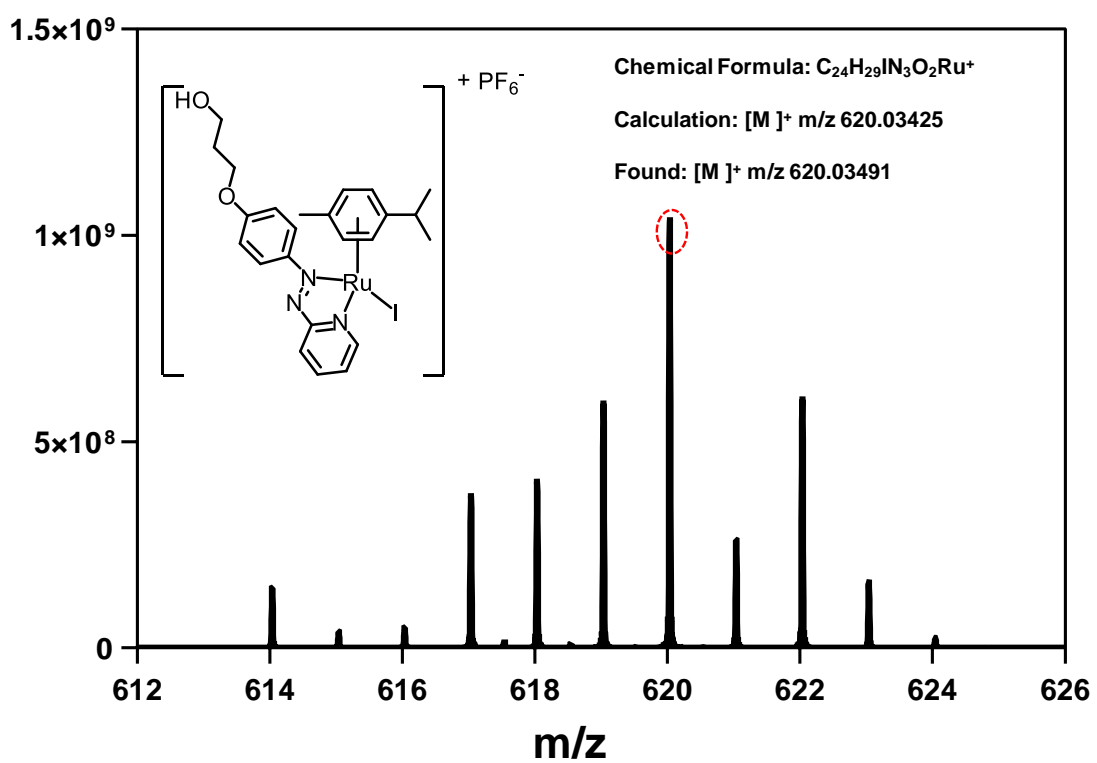

**Supplementary Figure 10.** High-resolution mass spectrum (HR-MS) of Ru(II)-OH.

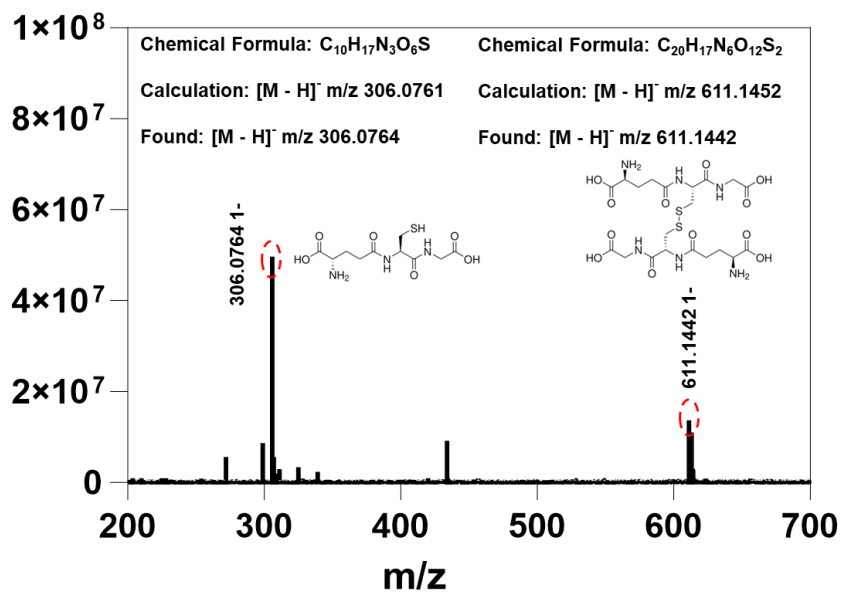

Supplementary Figure 11. HR-MS of the mixture of Ru(II)-OH and glutathione (GSH).

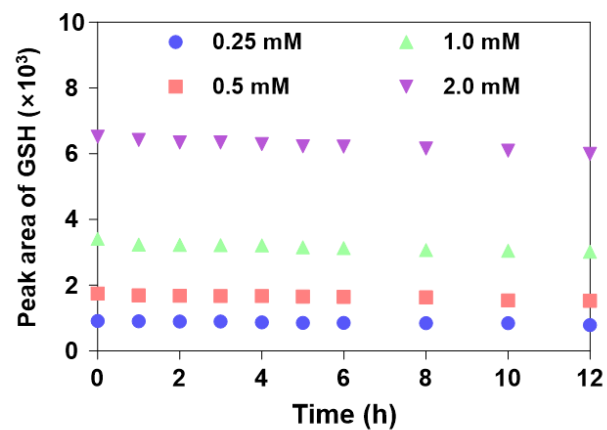

**Supplementary Figure 12.** Monitoring of possible changes in the GSH concentration upon incubation of a solution of GSH in phosphate-buffered saline (PBS) without the catalyst.

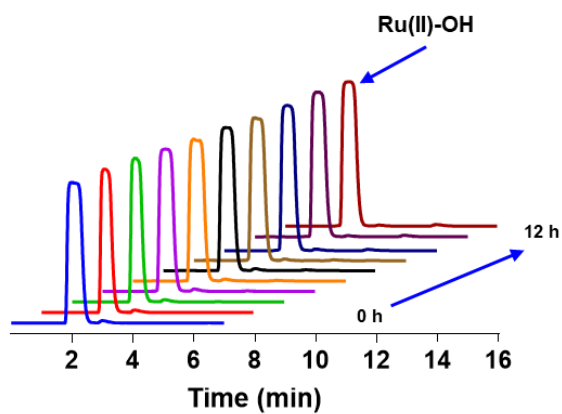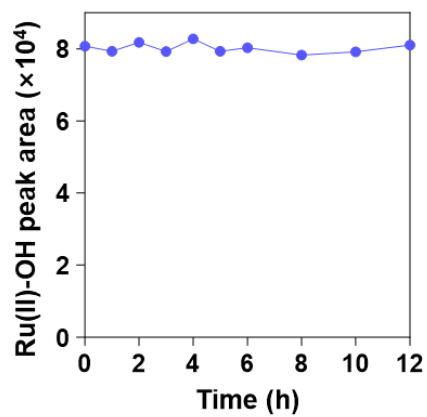

**Supplementary Figure 13.** Monitoring of the concentration of Ru(II)-OH during the catalytic transformation.



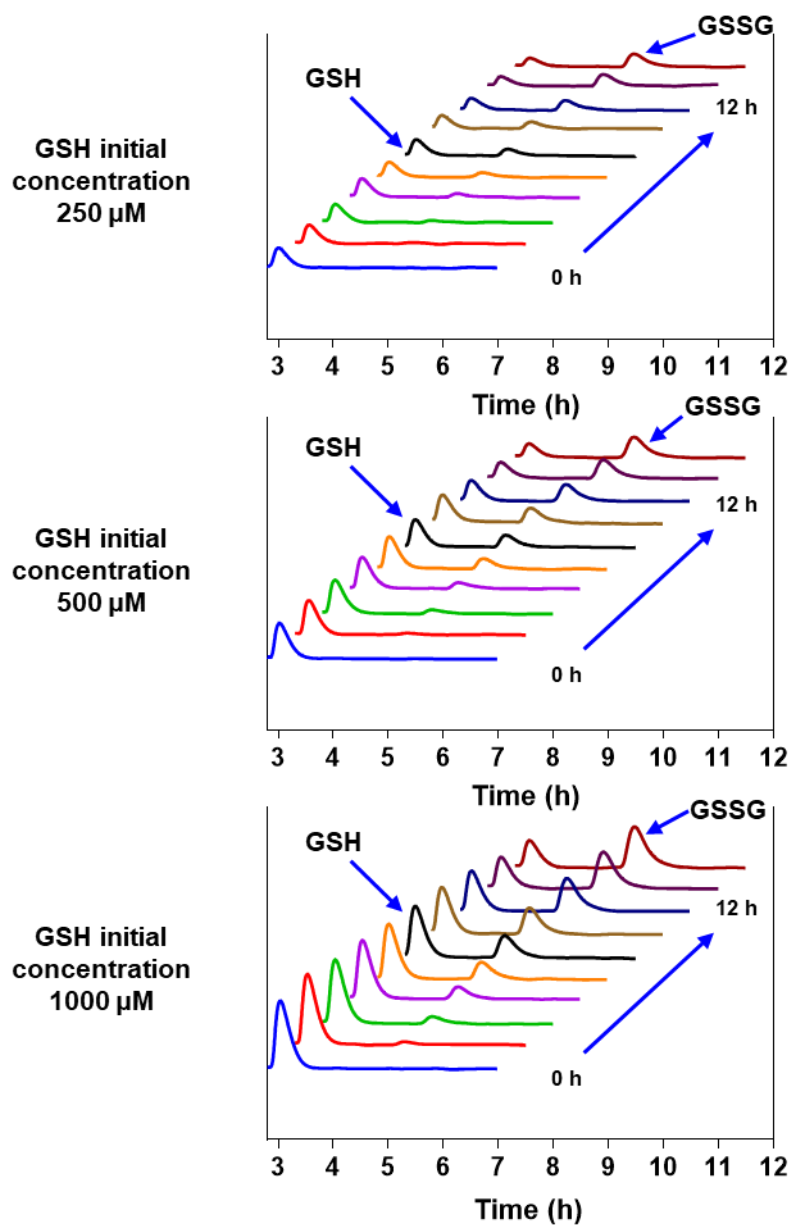

**Supplementary Figure 14.** Ultra performance liquid chromatography (UPLC) chromatograms of the conversion of GSH (250 μM, 500 μM, 1000 μM) to glutathione disulfide (GSSG) in the presence of Ru(II)-OH (50 μM).

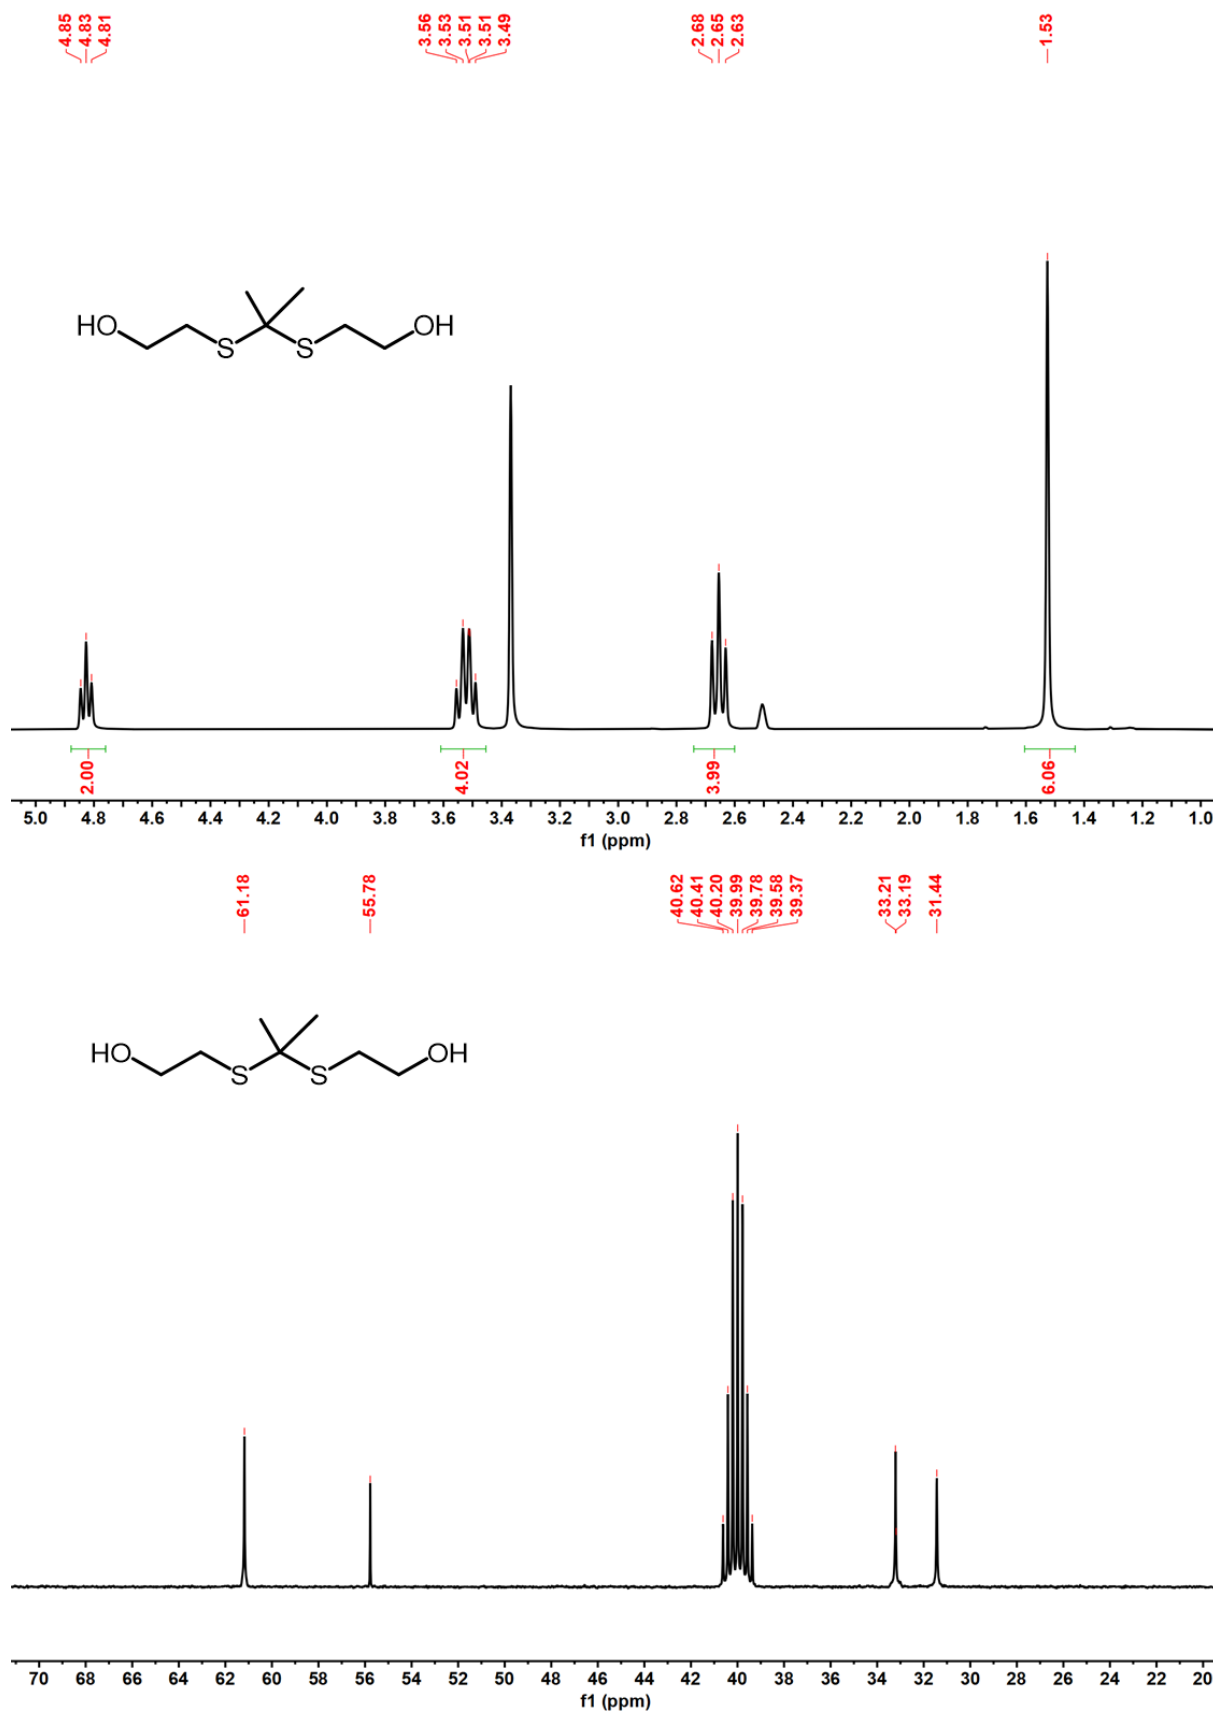

**Supplementary Figure 15.** <sup>1</sup>H-NMR and <sup>13</sup>C-NMR spectra of 2,2'-(propane-2,2-diylbis(sulfaneyl))bis(ethan-1-ol) in DMSO-*d*<sub>6</sub>.

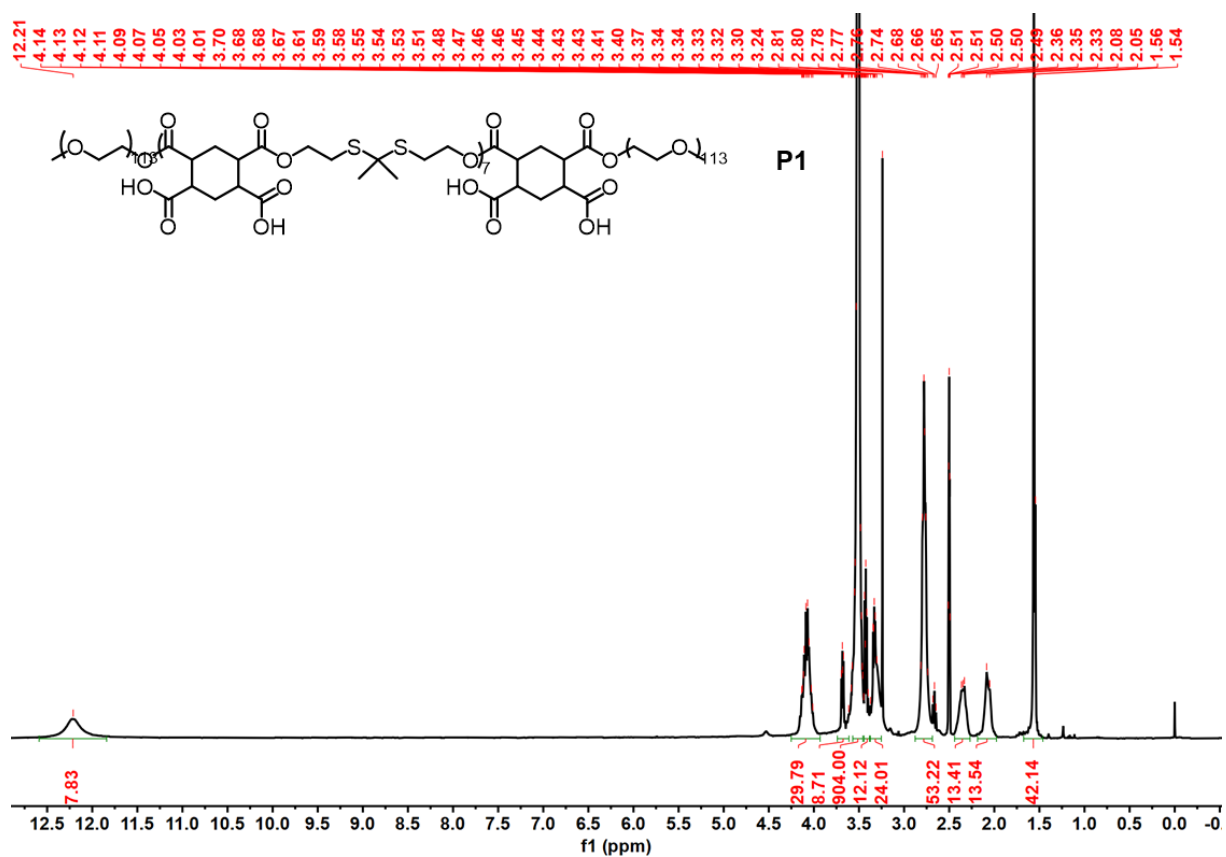

**Supplementary Figure 16.** <sup>1</sup>H-NMR spectrum of P1 in DMSO-*d*<sub>6</sub>.

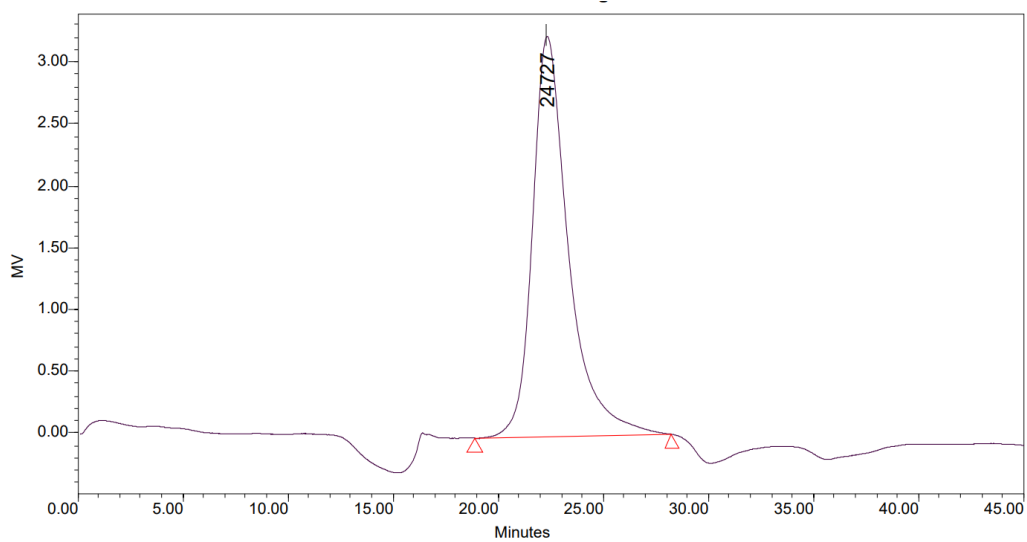

**Supplementary Figure 17.** Gel permeation chromatogram (GPC) of P1 in N, N-dimethylformamide (DMF).

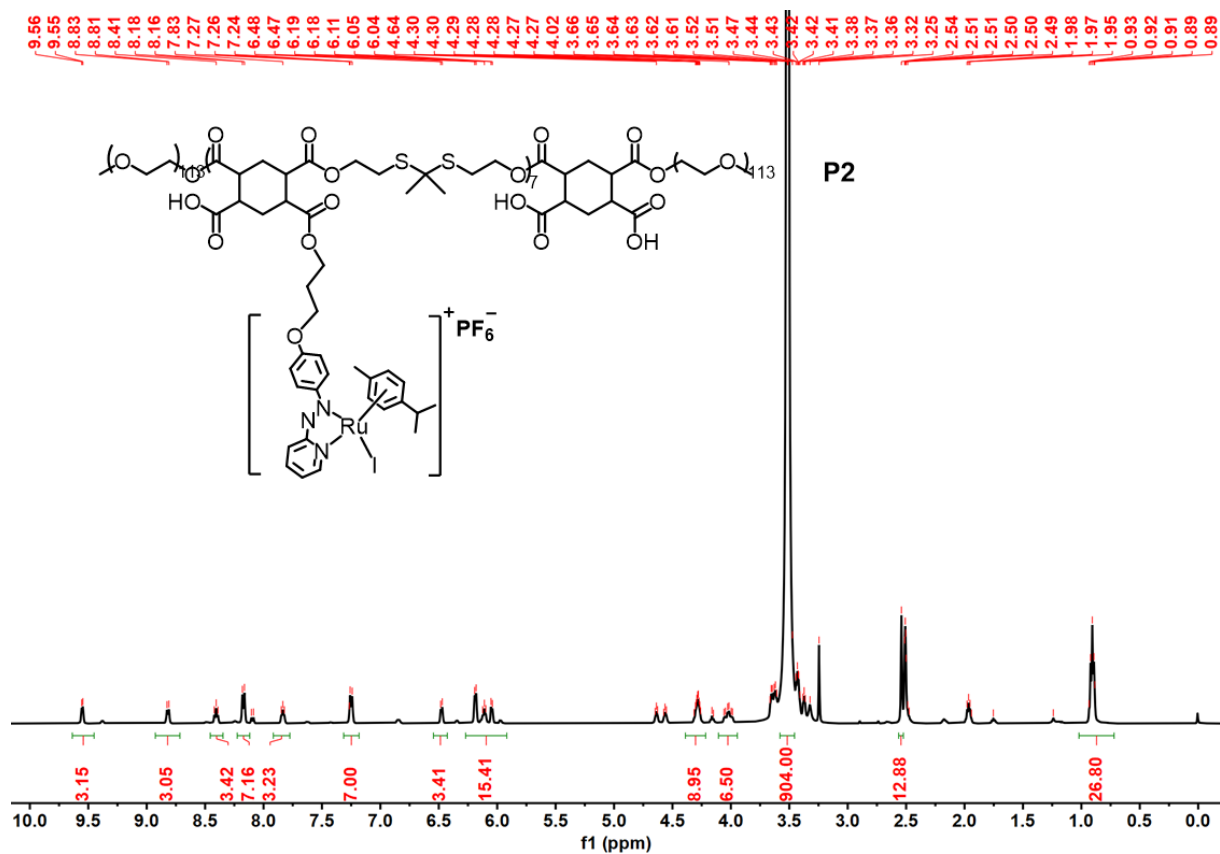

**Supplementary Figure 18.** <sup>1</sup>H-NMR spectrum of P2 in DMSO-*d*<sub>6</sub>.

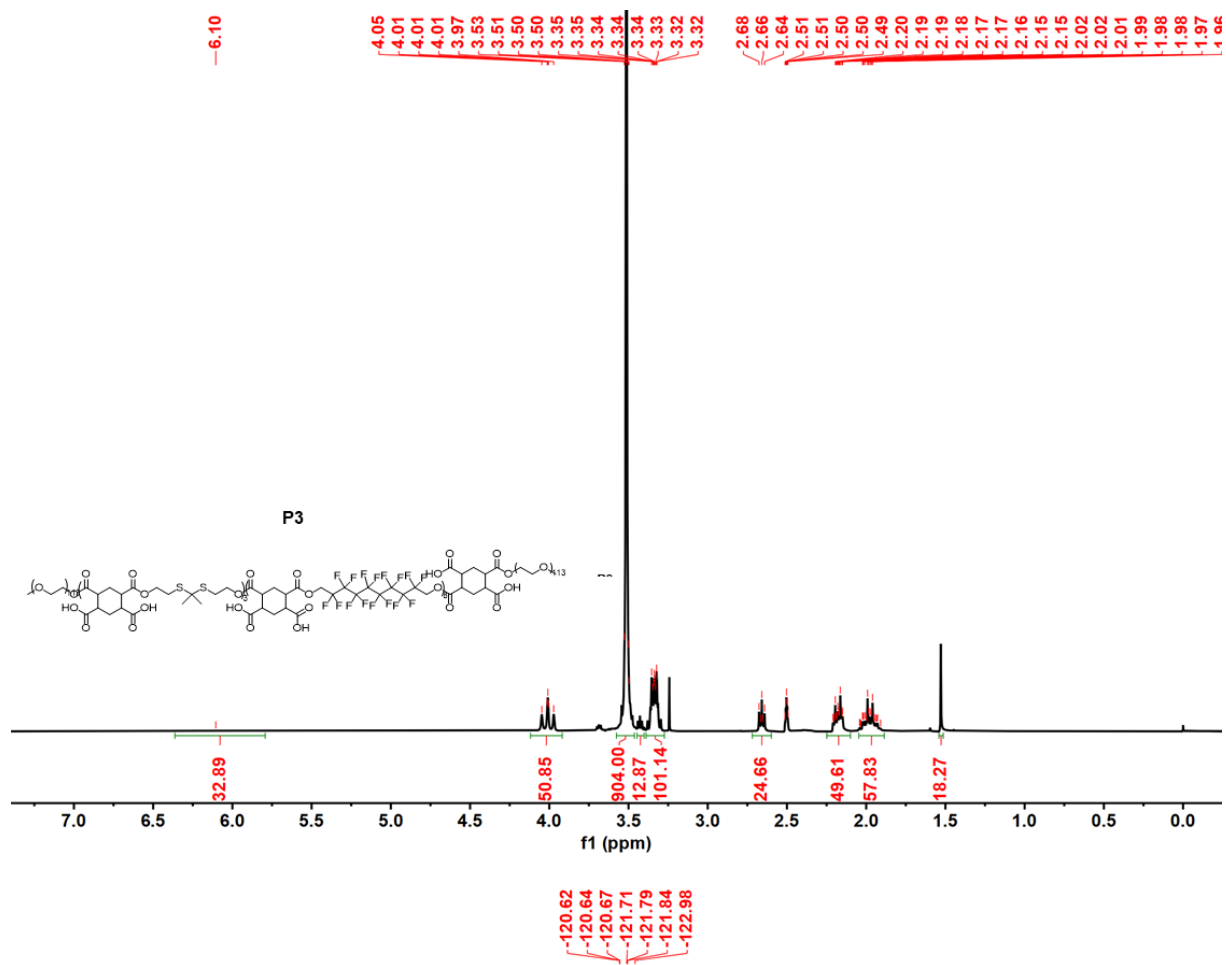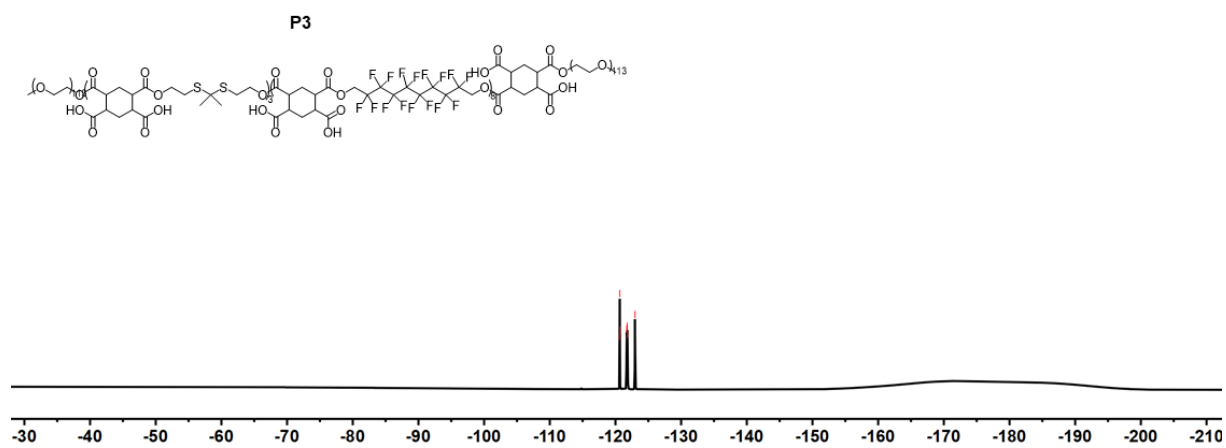

**Supplementary Figure 19.**  $^1\text{H}$ -NMR and  $^{19}\text{F}$  NMR spectrums of P3 in  $\text{DMSO-}d_6$ .

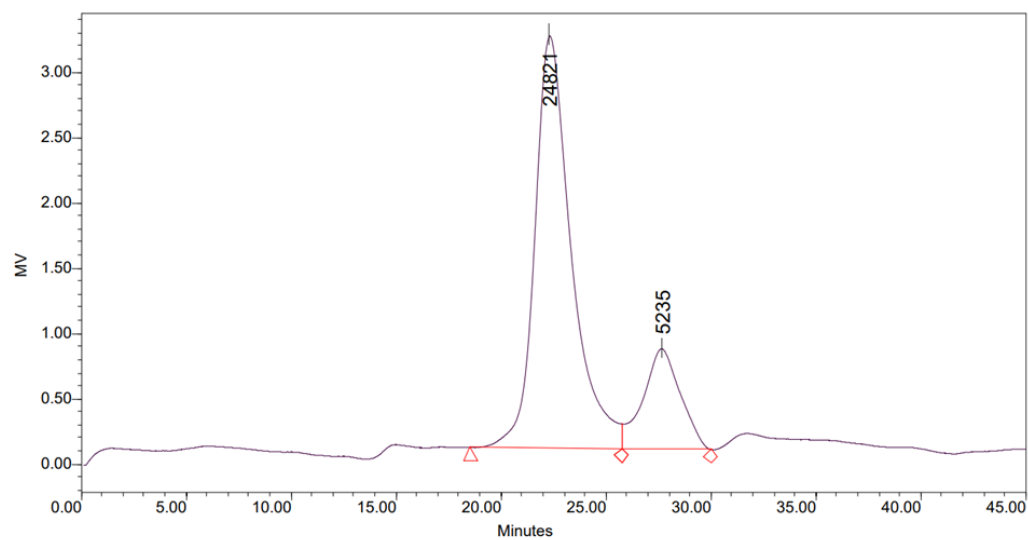

**Supplementary Figure 20.** GPC of P3 in DMF.

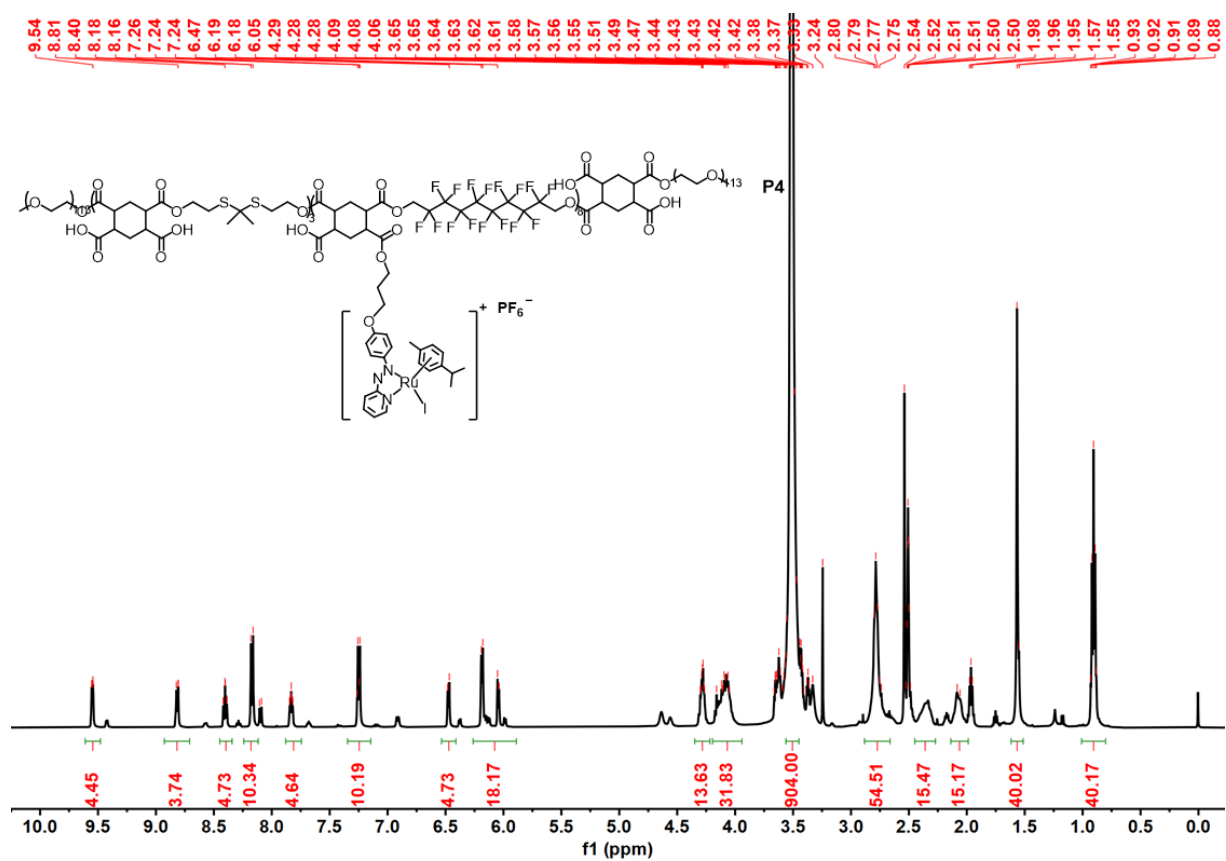

Supplementary Figure 21.  $^1\text{H-NMR}$  spectrum of P4 in  $\text{DMSO-}d_6$ .



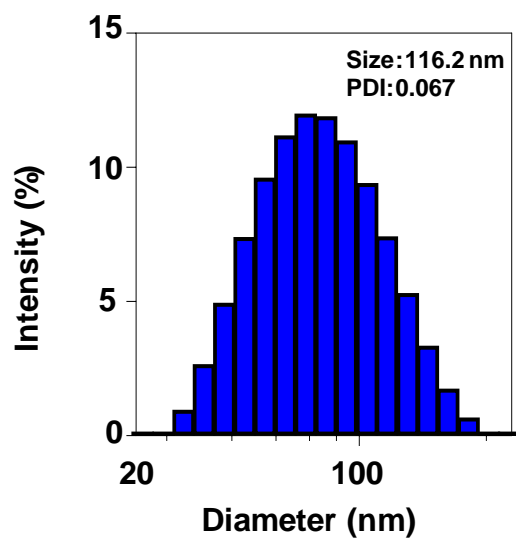

**Supplementary Figure 22.** Size distribution of NP2 detected by dynamic light scattering (DLS) (n = 3 independent experiments).

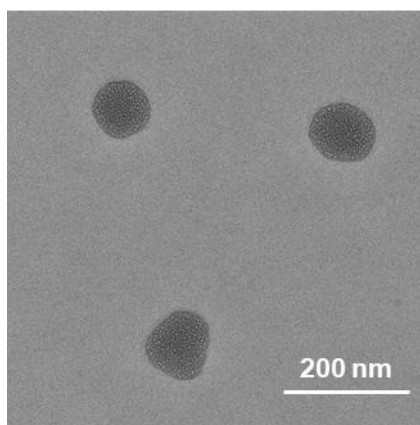

**Supplementary Figure 23.** Representative transmission electron microscope (TEM) image of NP2.

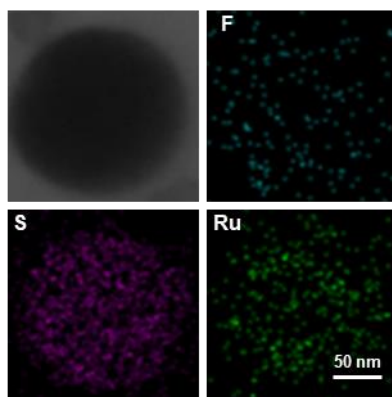

**Supplementary Figure 24.** Elemental distribution of NP2 analyzed by energy-dispersive X-ray spectroscopy.

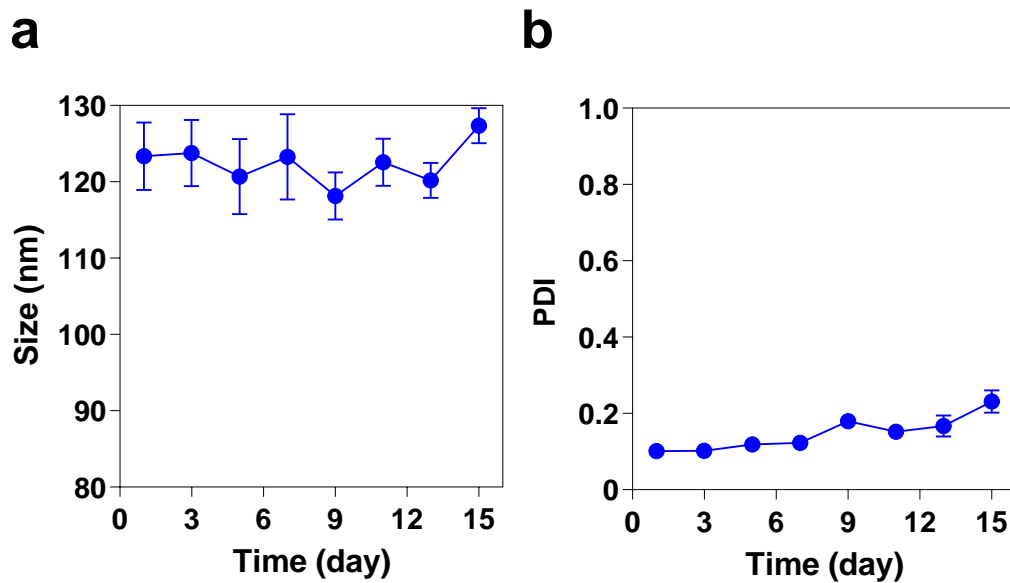

**Supplementary Figure 25.** Stability assessment of NP4 by DLS measurements. a) Change in average particle size of NP4 over 14 days. b) Change in polydispersity index (PDI) of NP4 over 14 days (n = 3 independent experiments).

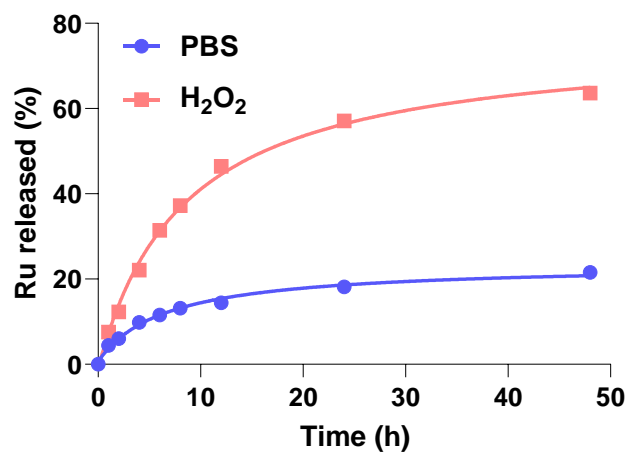

**Supplementary Figure 26.** Representative ruthenium (Ru) release profile of NP4 upon incubation in PBS or hydrogen peroxide (H<sub>2</sub>O<sub>2</sub>, 10 mM) determined by Inductively coupled plasma-Mass Spectrometry (ICP-MS).

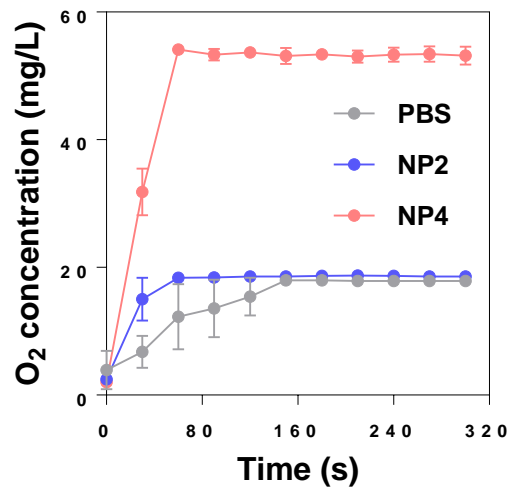

**Supplementary Figure 27.** Determination of oxygen storage capacity of the compounds (n = 3 independent experiments).

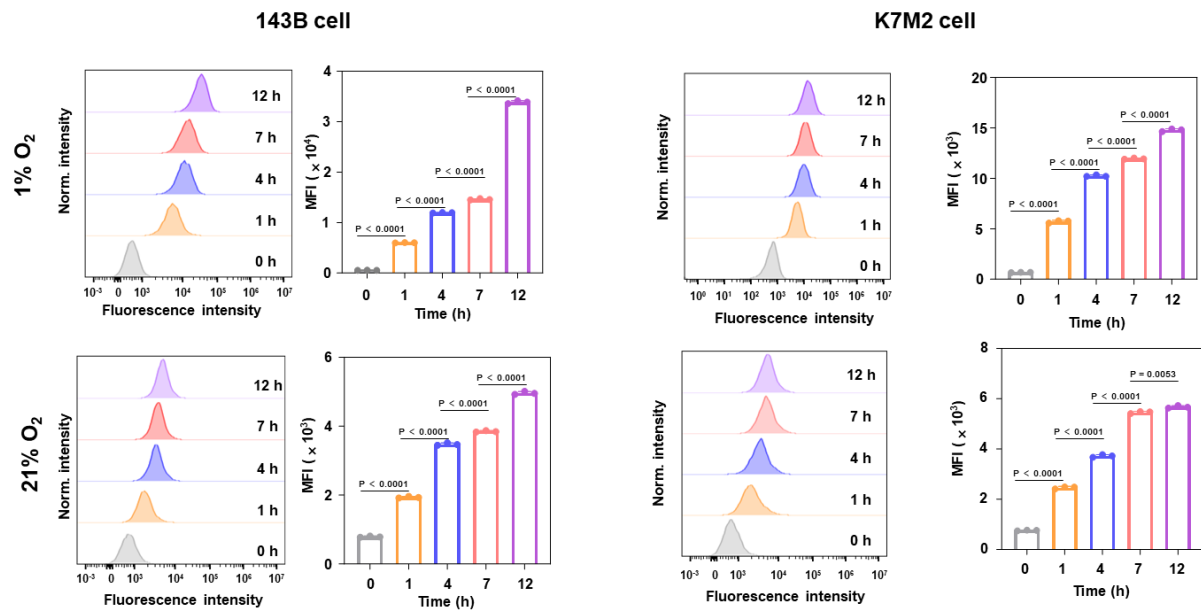

**Supplementary Figure 28.** The cellular uptake of nanoparticles was detected in K7M2 cells or 143B cells under 1% O<sub>2</sub> and 21% O<sub>2</sub> conditions by flow cytometry, n = 3 independent experiments, Data are presented as mean  $\pm$  standard deviation (SD). Statistical significance between every two groups was calculated by T-test, the statistical test used was two-sided..

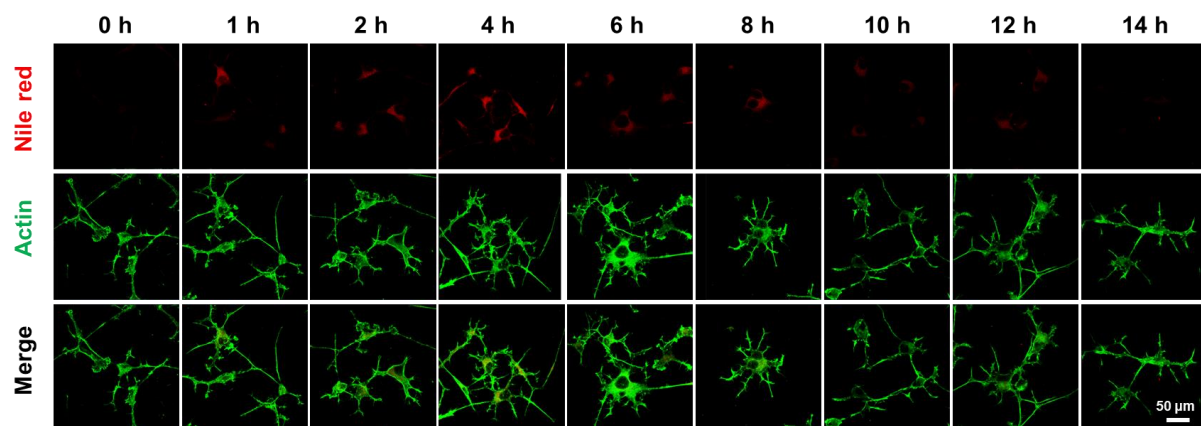

**Supplementary Figure 29.** Confocal laser scanning microscopy (CLSM) images of 143B cells incubated with NP4-NR for different times.



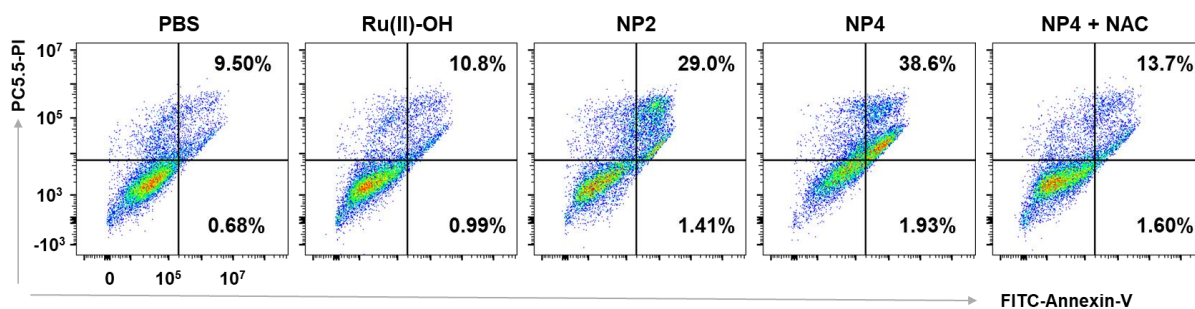

**Supplementary Figure 30.** Flow cytometry plots of 143B cells under hypoxic conditions treated with of Ru(II)-OH, NP2, NP4, and NP4 +NAC (10  $\mu$ M Ru) for 24 h and stained with Annexin V-FITC and propidium iodide.

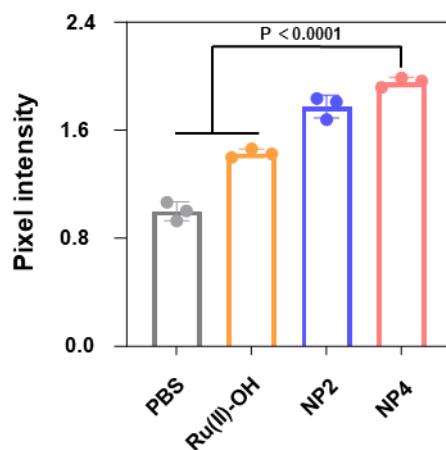

**Supplementary Figure 31.** Fluorescence semi-quantitative analysis of 143B cells under hypoxic conditions treated with of Ru(II)-OH, NP2, and NP4 (10  $\mu$ M Ru) for 6 h and stained with the lipid peroxide specific probe C11-BODIPY (green) and DAPI (blue, nucleus),  $n = 3$  independent experiments. Data are presented as mean  $\pm$  standard deviation (SD). Statistical significance between every two groups was calculated by T-test, the statistical test used was two-sided.

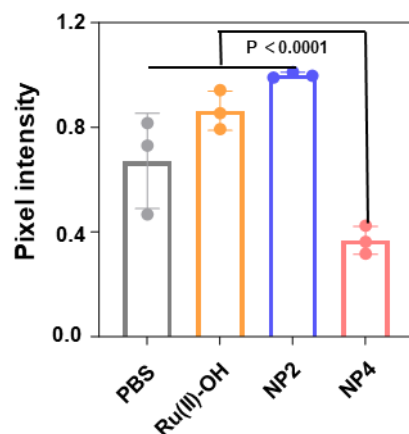

**Supplementary Figure 32.** Fluorescence semi-quantitative analysis of 143B cells under hypoxic conditions treated with of Ru(II)-OH, NP2, and NP4 (10  $\mu$ M Ru) for 12 h and stained with the hypoxia probe pimonidazole hydrochloride (green, hypoxia areas) and DAPI (blue, nucleus),  $n = 3$  independent experiments. Data are presented as mean  $\pm$  standard deviation (SD). Statistical significance between every two groups was calculated by T-test, the statistical test used was two-sided.

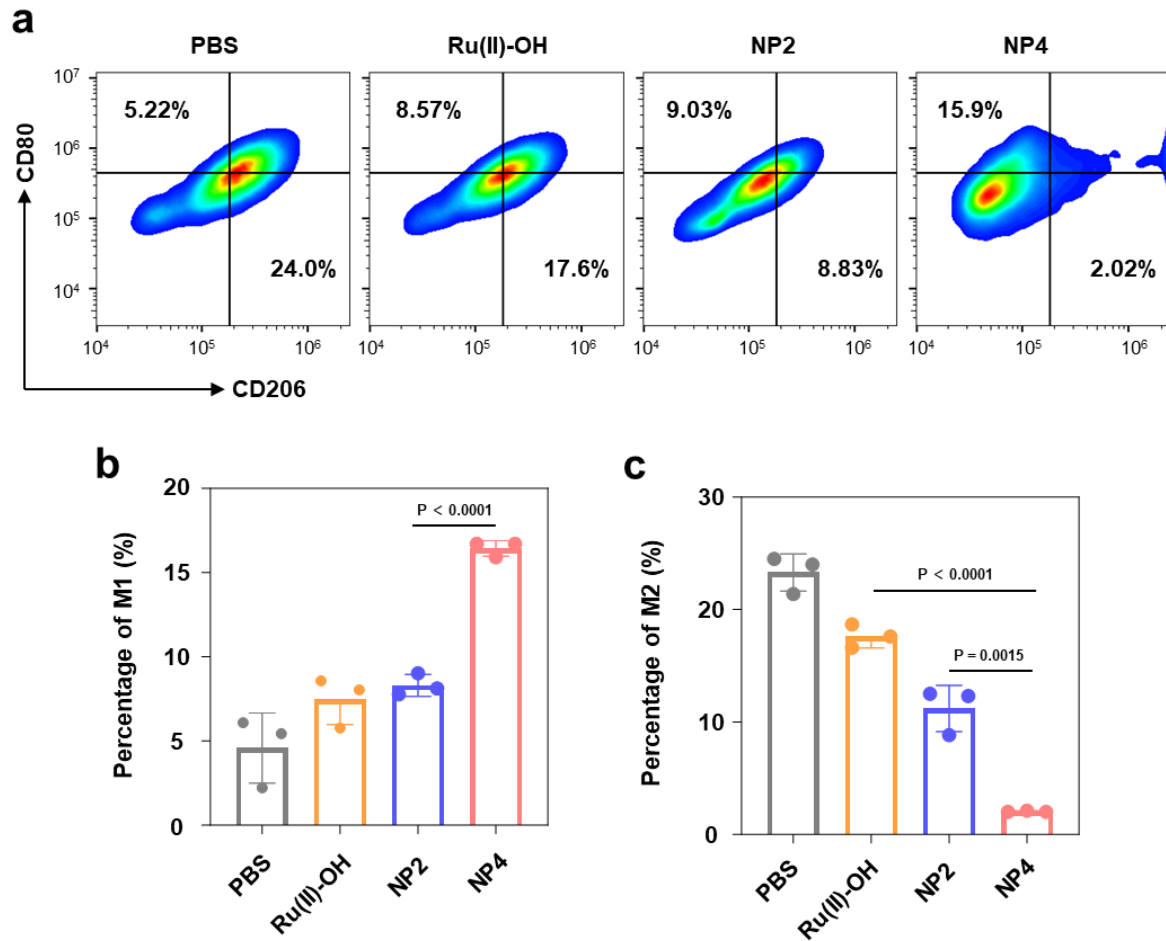

**Supplementary Figure 33.** The differentiation of tumor-associated macrophages (TAM). a) Flow cytometric analysis of CD80<sup>+</sup> CD206<sup>+</sup> bone marrow-derived macrophage (BMDM) gating on CD11c<sup>+</sup> cells co-cultured with K7M2 cells with various pretreatments. b) Percentage of M1-macrophages (CD11c<sup>+</sup> CD80<sup>+</sup>). c) Percentage of M2-macrophages (CD11c<sup>+</sup> CD206<sup>+</sup>). n = 3 independent experiments. Data are presented as mean ± standard deviation (SD). Statistical significance between every two groups was calculated by T-test, the statistical test used was two-sided.

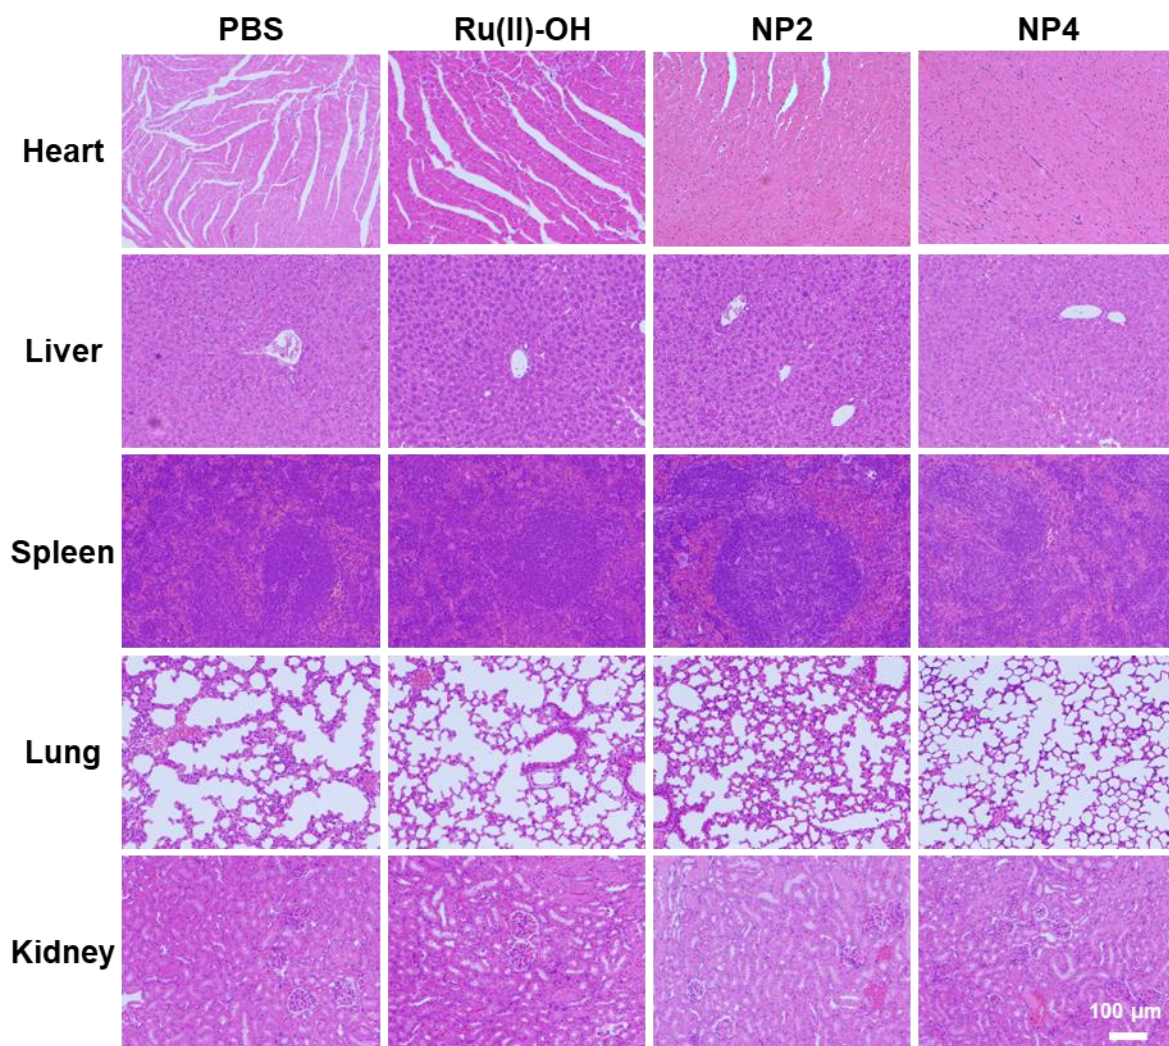

**Supplementary Figure 34.** Hematoxylin and eosin (H&E) stain of the major organs (heart, liver, spleen, lung, and kidney) of healthy mouse models upon treatment with PBS, Ru(II)-OH, NP2, and NP4 (2 mg/kg) on the days 1, 4, and 7. On day 14, the mice were sacrificed and the major organs were histologically analyzed (n = 3 mice).

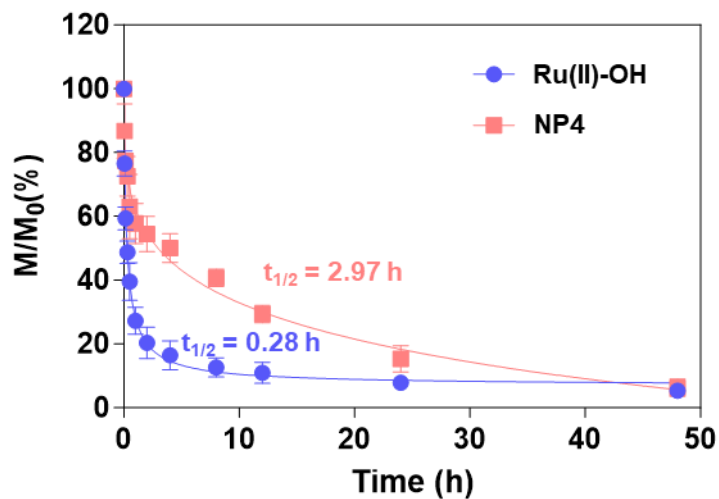

**Supplementary Figure 35.** Blood circulation half life time of Ru(II)-OH or NP4 determined by ICP-MS, (n = 3 mice).

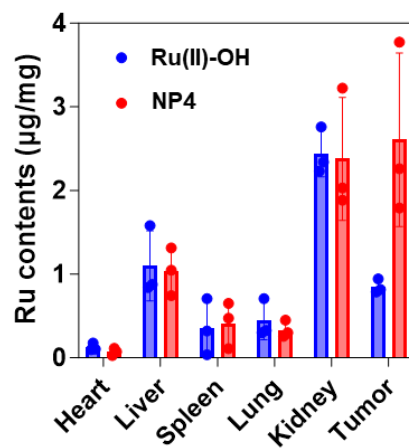

**Supplementary Figure 36.** Ruthenium contents in different organs and the tumor tissues of mice treated with NP4 and Ru(II)-OH determined by ICP-MS (n = 3 mice).

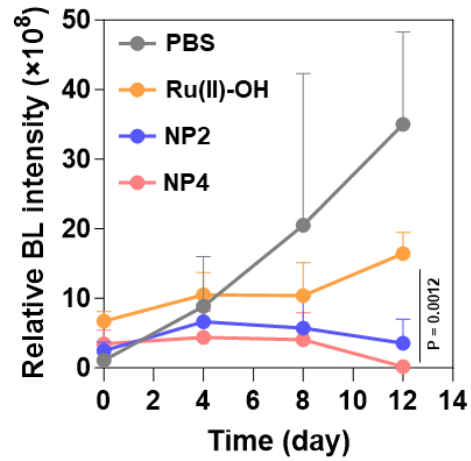

**Supplementary Figure 37.** Relative bioluminescent (BL) intensity upon various treatments in an orthotopic K7M2 osteosarcoma model,  $n = 3$  mice. Data are presented as mean  $\pm$  standard deviation (SD). Statistical significance between every two groups was calculated by T-test, the statistical test used was two-sided.



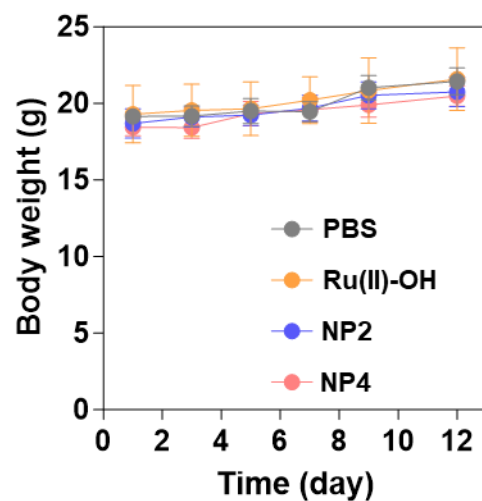

**Supplementary Figure 38.** Body weight upon various treatments in orthotopic K7M2 osteosarcoma model (n = 5 mice).

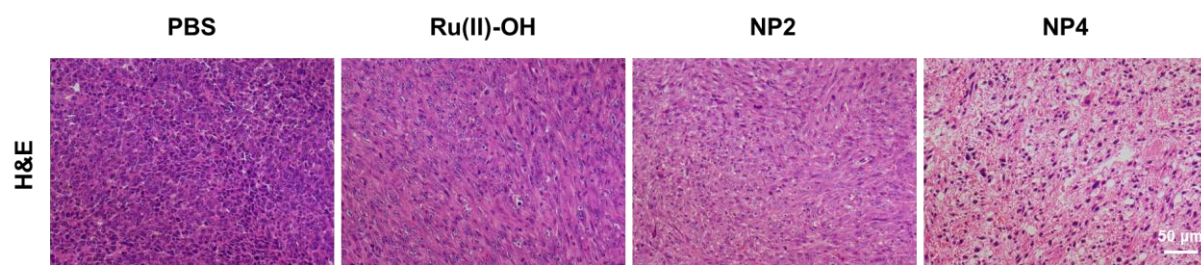

**Supplementary Figure 39.** H&E staining of tumor tissues after treatment in orthotopic K7M2 osteosarcoma model.

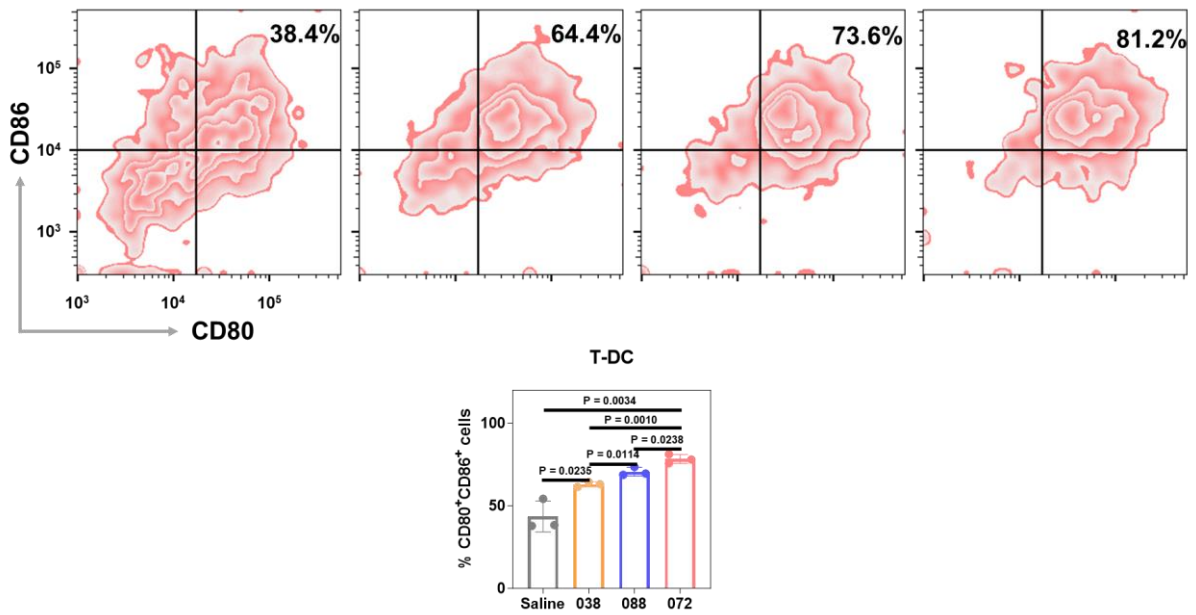

**Supplementary Figure 40.** Analysis of the levels of activated dendritic cells (CD80<sup>+</sup>, CD86<sup>+</sup>) in tumor obtained from variously treated K7M2 mouse models, n = 3 mice. Data are presented as mean ± standard deviation (SD). Statistical significance between every two groups was calculated by T-test, the statistical test used was two-sided.

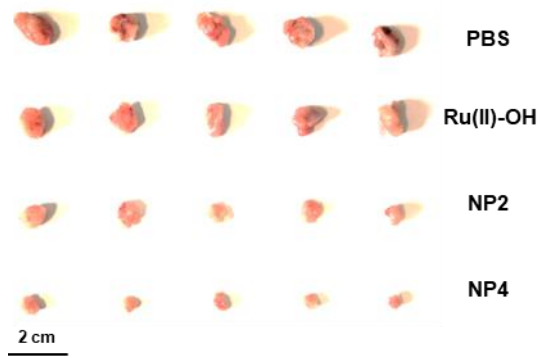

**Supplementary Figure 41.** Photographs of tumors obtained from treated 143B tumor-bearing mice.

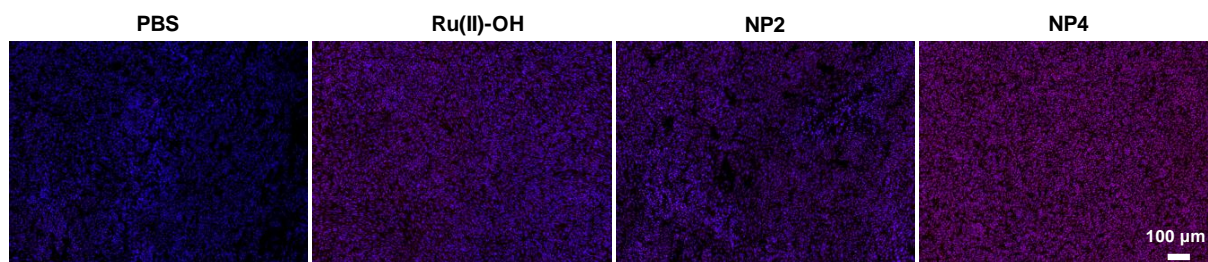

**Supplementary Figure 42.** Reactive oxygen species (ROS) (red) and DAPI (blue) staining of tumor tissues after treatment in a patient-derived osteosarcoma xenograft mouse model.

**Supplementary Table 1.** Parameters of the catalytic performance of Ru(II)-OH.

| Catalyst  | Temperature | Condition | Apparent k (h <sup>-1</sup> ) | TON  | TOF (h <sup>-1</sup> ) |
|-----------|-------------|-----------|-------------------------------|------|------------------------|
| Ru(II)-OH | 37 °C       | 50 μM Ru  | 0.0257                        | 38.2 | 0.3141                 |

**Supplementary Table 2.** The IC<sub>50</sub> of Ru(II)-OH, NP2, and NP4 on 143B and K7M2 cells under 21% O<sub>2</sub> and 1% O<sub>2</sub>

| IC <sub>50</sub> ( $\mu$ M) | 21% O <sub>2</sub> |                  | 1% O <sub>2</sub> |                 |
|-----------------------------|--------------------|------------------|-------------------|-----------------|
|                             | 143B               | K7M2             | 143B              | K7M2            |
| Ru(II)-OH                   | 7.57 $\pm$ 0.59    | 10.43 $\pm$ 0.76 | > 15              | > 15            |
| NP2                         | 6.88 $\pm$ 0.44    | 8.30 $\pm$ 0.17  | > 15              | > 15            |
| NP4                         | 6.06 $\pm$ 0.42    | 7.96 $\pm$ 0.43  | 6.57 $\pm$ 0.08   | 2.09 $\pm$ 0.59 |

**Supplementary Table 3.** Cartesian coordinates of the optimized structure of complex

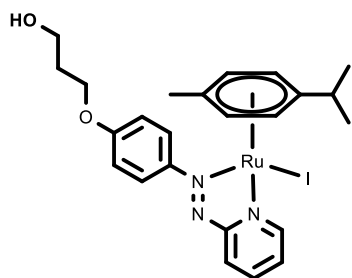

C 9.77000000 2.57700000 4.63000000  
C 10.19500000 3.36200000 5.71900000  
C 10.29200000 2.84000000 7.00800000  
C 9.95900000 1.47100000 7.21000000  
C 9.53800000 0.66800000 6.15400000  
C 9.43000000 1.21700000 4.82200000  
C 4.43300000 2.31300000 4.38400000  
C 4.12200000 0.99000000 4.23700000  
C 5.00000000 0.02700000 4.71100000  
C 6.16900000 0.41800000 5.32400000  
N 6.50400000 1.71900000 5.45600000  
C 5.64200000 2.65400000 5.00000000  
N 5.97100000 3.98600000 5.17000000  
N 7.13200000 4.14700000 5.75400000  
C 7.53500000 5.46600000 5.94000000  
C 6.98300000 6.51800000 5.18100000  
C 7.38400000 7.79100000 5.35000000  
C 8.37100000 8.12700000 6.32900000  
C 8.89900000 7.07500000 7.10500000  
C 8.47400000 5.77300000 6.90600000  
I 6.97200000 2.48800000 8.61500000  
Ru 8.24000000 2.47300000 6.23400000  
H 10.04210000 1.09590000 8.20860000  
H 10.62190000 3.49220000 7.78950000  
H 9.68420000 2.96690000 3.63730000  
H 9.10280000 0.56740000 4.03730000  
H 6.83090000 -0.33060000 5.70670000  
H 4.77060000 -1.01230000 4.60110000



H 3.20900000 0.70000000 3.76030000  
H 3.76510000 3.07260000 4.03490000  
H 8.88010000 4.98970000 7.51140000  
H 9.63410000 7.28480000 7.85370000  
H 6.95850000 8.56300000 4.74340000  
H 6.22850000 6.29920000 4.45450000  
C 10.54400000 4.83100000 5.41600000  
H 9.80310000 5.24680000 4.76560000  
H 10.56930000 5.38730000 6.32970000  
H 11.50220000 4.87960000 4.94230000  
C 9.20160000 -0.79950000 6.47780000  
H 8.45590000 -1.15310000 5.79680000  
C 8.66840000 -0.89790000 7.91910000  
H 7.71050000 -1.37450000 7.91340000  
H 9.34890000 -1.47200000 8.51270000  
H 8.57540000 0.08440000 8.33290000  
C 10.47160000 -1.65970000 6.34030000  
H 10.97320000 -1.41180000 5.42830000  
H 11.12220000 -1.46980000 7.16830000  
H 10.20150000 -2.69510000 6.32890000  
O 8.80520000 9.47690000 6.51360000  
C 10.23450000 9.52130000 6.51960000  
H 10.60140000 9.07440000 7.41990000  
H 10.61160000 8.98340000 5.67500000  
C 10.70290000 10.98650000 6.44600000  
H 10.28000000 11.53750000 7.25990000  
H 10.38360000 11.41690000 5.51980000  
O 12.12970000 11.03540000 6.52760000  
H 12.41970000 11.95060000 6.52350000

**Supplementary Table 4.** Cartesian coordinates of the optimized structure of complex

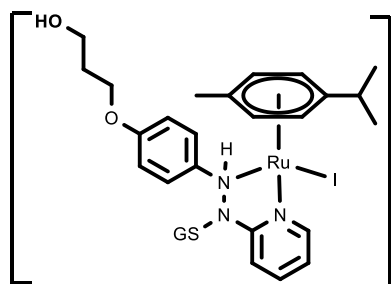

C 9.79860000 2.65040000 4.13830000  
C 10.27580000 3.40480000 5.22730000  
C 10.44860000 2.84300000 6.49130000  
C 10.13990000 1.46470000 6.66670000  
C 9.66860000 0.69120000 5.60980000  
C 9.48220000 1.28130000 4.30430000  
C 4.45880000 2.33580000 4.17710000  
C 4.15230000 1.01490000 4.00450000  
C 5.06400000 0.04690000 4.39800000  
C 6.26140000 0.43090000 4.95830000  
N 6.59120000 1.73060000 5.11400000  
C 5.69680000 2.67020000 4.73660000  
N 6.02240000 3.99960000 4.93150000  
N 7.21230000 4.15460000 5.45580000  
C 7.61280000 5.47130000 5.66220000  
C 7.01010000 6.54090000 4.96930000  
C 7.40810000 7.81220000 5.15730000  
C 8.44450000 8.12760000 6.09110000  
C 9.02420000 7.05720000 6.80230000  
C 8.60090000 5.75760000 6.58470000  
I 7.22580000 2.40340000 8.26580000  
Ru 8.36050000 2.47840000 5.81960000  
H 10.28150000 1.05880000 7.64650000  
H 10.81520000 3.47350000 7.27430000  
H 9.65450000 3.07090000 3.16500000  
H 9.11820000 0.65360000 3.51810000  
H 6.95030000 -0.32220000 5.27960000

H 4.83840000 -0.99080000 4.26710000  
H 3.21710000 0.73020000 3.56940000  
H 3.76570000 3.09880000 3.89010000  
H 9.04700000 4.95990000 7.14110000  
H 9.79750000 7.25100000 7.51590000  
H 6.94270000 8.59850000 4.60040000  
H 6.21870000 6.33720000 4.27850000  
C 10.59400000 4.88650000 4.95350000  
H 9.81450000 5.31470000 4.35860000  
H 10.66460000 5.41360000 5.88200000  
H 11.52410000 4.96070000 4.42970000  
C 9.36420000 -0.78950000 5.90370000  
H 8.58530000 -1.12930000 5.25360000  
C 8.91230000 -0.93970000 7.36820000  
H 7.95990000 -1.42640000 7.39960000  
H 9.62980000 -1.52500000 7.90450000  
H 8.83320000 0.02780000 7.81820000  
C 10.63250000 -1.63080000 5.66880000  
H 11.08070000 -1.34840000 4.73920000  
H 11.32600000 -1.46040000 6.46560000  
H 10.37170000 -2.66820000 5.63860000  
O 8.87580000 9.47560000 6.29530000  
C 10.30280000 9.53540000 6.22430000  
H 10.72290000 9.06410000 7.08810000  
H 10.63760000 9.02900000 5.34330000  
C 10.75290000 11.00730000 6.17280000  
H 10.37050000 11.52730000 7.02620000  
H 10.37900000 11.46360000 5.28000000  
O 12.18150000 11.06920000 6.17750000  
H 12.46240000 11.98720000 6.18730000  
H 6.84710000 4.10850000 6.38560000  
C 3.71920000 5.09570000 3.97240000  
H 3.77850000 4.76930000 2.95500000  
H 3.09820000 4.42360000 4.52690000

S 5.13070000 5.11660000 4.58780000  
C 3.11610000 6.51180000 4.02280000  
N 3.74690000 7.29720000 5.18770000  
C 3.47160000 6.60210000 6.45330000  
H 4.26380000 8.14850000 5.09710000  
O 2.71760000 5.38700000 6.45240000  
C 3.99520000 7.18230000 7.78030000  
H 5.06280000 7.24380000 7.74600000  
H 3.58620000 8.15990000 7.92810000  
C 3.57070000 6.26700000 8.94370000  
H 2.50310000 6.20550000 8.97790000  
H 3.97970000 5.28940000 8.79590000  
C 4.09430000 6.84730000 10.27070000  
H 3.68530000 7.82490000 10.41850000  
N 5.56110000 6.93180000 10.22370000  
H 5.84820000 7.86540000 10.43810000  
H 5.95300000 6.30050000 10.89290000  
H 5.87990000 6.68710000 9.30800000  
C 3.66990000 5.93200000 11.43410000  
O 2.90560000 4.75190000 11.17340000  
O 4.04010000 6.26220000 12.77540000  
H 2.05840000 6.44400000 4.16980000  
C 3.40450000 7.24020000 2.69690000  
O 4.15850000 8.45530000 2.69790000  
N 2.90480000 6.68630000 1.43030000  
H 3.28700000 5.77260000 1.29220000  
C 3.30990000 7.56000000 0.31970000  
H 2.90090000 8.53760000 0.46750000  
H 4.37760000 7.62150000 0.28550000  
C 2.78640000 6.97970000 -1.00720000  
O 3.05420000 7.65600000 -2.23840000  
O 2.03240000 5.76470000 -1.00820000

**Supplementary Table 5.** Cartesian coordinates of the optimized structure of complex

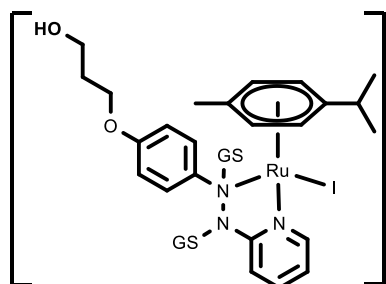

C 9.79860000 2.65040000 4.13830000  
 C 10.27580000 3.40480000 5.22730000  
 C 10.44860000 2.84300000 6.49130000  
 C 10.13990000 1.46470000 6.66670000  
 C 9.66860000 0.69120000 5.60980000  
 C 9.48220000 1.28130000 4.30430000  
 C 4.45880000 2.33580000 4.17710000  
 C 4.15230000 1.01490000 4.00450000  
 C 5.06400000 0.04690000 4.39800000  
 C 6.26140000 0.43090000 4.95830000  
 N 6.59120000 1.73060000 5.11400000  
 C 5.69680000 2.67020000 4.73660000  
 N 6.02240000 3.99960000 4.93150000  
 N 7.21230000 4.15460000 5.45580000  
 C 7.61280000 5.47130000 5.66220000  
 C 7.01010000 6.54090000 4.96930000  
 C 7.40810000 7.81220000 5.15730000  
 C 8.44450000 8.12760000 6.09110000  
 C 9.02420000 7.05720000 6.80230000  
 C 8.60090000 5.75760000 6.58470000  
 I 7.22580000 2.40340000 8.26580000  
 Ru 8.36050000 2.47840000 5.81960000  
 H 10.28150000 1.05880000 7.64650000  
 H 10.81520000 3.47350000 7.27430000  
 H 9.65450000 3.07090000 3.16500000  
 H 9.11820000 0.65360000 3.51810000  
 H 6.95030000 -0.32220000 5.27960000  
 H 4.83840000 -0.99080000 4.26710000

H 3.21710000 0.73020000 3.56940000  
H 3.76570000 3.09880000 3.89010000  
H 9.04700000 4.95990000 7.14110000  
H 9.79750000 7.25100000 7.51590000  
H 6.94270000 8.59850000 4.60040000  
H 6.21870000 6.33720000 4.27850000  
C 10.59400000 4.88650000 4.95350000  
H 9.81450000 5.31470000 4.35860000  
H 10.66460000 5.41360000 5.88200000  
H 11.52410000 4.96070000 4.42970000  
C 9.36420000 -0.78950000 5.90370000  
H 8.58530000 -1.12930000 5.25360000  
C 8.91230000 -0.93970000 7.36820000  
H 7.95990000 -1.42640000 7.39960000  
H 9.62980000 -1.52500000 7.90450000  
H 8.83320000 0.02780000 7.81820000  
C 10.63250000 -1.63080000 5.66880000  
H 11.08070000 -1.34840000 4.73920000  
H 11.32600000 -1.46040000 6.46560000  
H 10.37170000 -2.66820000 5.63860000  
O 8.87580000 9.47560000 6.29530000  
C 10.30280000 9.53540000 6.22430000  
H 10.72290000 9.06410000 7.08810000  
H 10.63760000 9.02900000 5.34330000  
C 10.75290000 11.00730000 6.17280000  
H 10.37050000 11.52730000 7.02620000  
H 10.37900000 11.46360000 5.28000000  
O 12.18150000 11.06920000 6.17750000  
H 12.46240000 11.98720000 6.18730000  
C 7.69560000 4.12620000 3.36870000  
H 8.16790000 4.91950000 3.90980000  
H 8.00490000 3.18520000 3.77310000  
S 6.16640000 4.26030000 3.49200000  
C 8.09990000 4.20510000 1.88480000

N 6.92600000 3.73280000 1.00710000  
C 6.58610000 2.34420000 1.34910000  
H 6.46610000 4.28530000 0.31190000  
O 7.32090000 1.65790000 2.36600000  
C 5.43870000 1.62840000 0.61240000  
H 4.52570000 2.16400000 0.76850000  
H 5.65570000 1.59090000 -0.43470000  
C 5.29320000 0.19570000 1.15800000  
H 6.20630000 -0.33990000 1.00190000  
H 5.07620000 0.23310000 2.20500000  
C 4.14580000 -0.52010000 0.42120000  
H 4.36280000 -0.55760000 -0.62590000  
N 2.89140000 0.21560000 0.63560000  
H 2.47480000 0.42880000 -0.24820000  
H 2.26310000 -0.34630000 1.17350000  
H 3.08310000 1.06510000 1.12720000  
C 4.00030000 -1.95280000 0.96680000  
O 4.86990000 -2.41490000 2.00360000  
O 2.99540000 -2.82120000 0.43660000  
H 8.94910000 3.57730000 1.71270000  
C 8.45600000 5.66000000 1.52640000  
O 7.72120000 6.34620000 0.50940000  
N 9.55110000 6.34320000 2.22970000  
H 9.34830000 6.37810000 3.20830000  
C 9.69010000 7.71080000 1.70880000  
H 9.90710000 7.67340000 0.66180000  
H 8.77700000 8.24640000 1.86490000  
C 10.83740000 8.42660000 2.44570000  
O 11.16800000 9.77740000 2.11290000  
O 11.57220000 7.74040000 3.46250000  
S 6.25150000 4.65560000 6.77870000  
C 6.11890000 5.71950000 7.88420000  
H 7.06190000 6.20460000 8.02730000  
H 5.38550000 6.44340000 7.59640000

C 5.68490000 5.04340000 9.19800000  
N 4.90870000 3.75210000 8.87870000  
H 5.05650000 5.70960000 9.75140000  
C 6.93130000 4.69950000 10.03460000  
C 3.71890000 4.08020000 8.08030000  
H 5.17310000 2.83260000 9.16970000  
O 7.20240000 3.34070000 10.38850000  
N 7.84240000 5.76800000 10.46920000  
O 3.44780000 5.43900000 7.72640000  
C 2.76440000 2.96080000 7.62480000  
H 8.21160000 6.23790000 9.66740000  
C 8.94550000 5.18530000 11.24690000  
H 3.29920000 2.26170000 7.01660000  
H 2.36930000 2.45810000 8.48270000  
C 1.60890000 3.57140000 6.81030000  
H 8.55040000 4.68250000 12.10470000  
H 9.48020000 4.48610000 10.63850000  
C 9.90000000 6.30470000 11.70220000  
H 1.07420000 4.27050000 7.41850000  
H 2.00400000 4.07410000 5.95240000  
C 0.65430000 2.45190000 6.35490000  
O 11.05740000 5.98540000 12.47900000  
O 9.62890000 7.66340000 11.34830000  
H 0.25920000 1.94910000 7.21280000  
N 1.38900000 1.49130000 5.51920000  
C -0.50110000 3.06230000 5.54020000  
H 1.27080000 0.56950000 5.88850000  
H 1.03530000 1.52380000 4.58440000  
H 2.36080000 1.72700000 5.51630000  
O -0.55210000 4.47410000 5.31880000  
O -1.52330000 2.21740000 5.00520000



**Supplementary Table S6.** Cartesian coordinates of the optimized structure of complex.

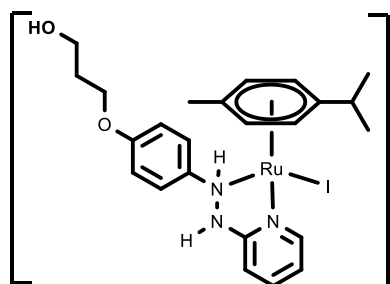

C 9.79860000 2.65040000 4.13830000  
C 10.27580000 3.40480000 5.22730000  
C 10.44860000 2.84300000 6.49130000  
C 10.13990000 1.46470000 6.66670000  
C 9.66860000 0.69120000 5.60980000  
C 9.48220000 1.28130000 4.30430000  
C 4.45880000 2.33580000 4.17710000  
C 4.15230000 1.01490000 4.00450000  
C 5.06400000 0.04690000 4.39800000  
C 6.26140000 0.43090000 4.95830000  
N 6.59120000 1.73060000 5.11400000  
C 5.69680000 2.67020000 4.73660000  
N 6.02240000 3.99960000 4.93150000  
N 7.21230000 4.15460000 5.45580000  
C 7.61280000 5.47130000 5.66220000  
C 7.01010000 6.54090000 4.96930000  
C 7.40810000 7.81220000 5.15730000  
C 8.44450000 8.12760000 6.09110000  
C 9.02420000 7.05720000 6.80230000  
C 8.60090000 5.75760000 6.58470000  
I 7.22580000 2.40340000 8.26580000  
Ru 8.36050000 2.47840000 5.81960000  
H 10.28150000 1.05880000 7.64650000  
H 10.81520000 3.47350000 7.27430000  
H 9.65450000 3.07090000 3.16500000  
H 9.11820000 0.65360000 3.51810000  
H 6.95030000 -0.32220000 5.27960000  
H 4.83840000 -0.99080000 4.26710000

H 3.21710000 0.73020000 3.56940000  
H 3.76570000 3.09880000 3.89010000  
H 9.04700000 4.95990000 7.14110000  
H 9.79750000 7.25100000 7.51590000  
H 6.94270000 8.59850000 4.60040000  
H 6.21870000 6.33720000 4.27850000  
C 10.59400000 4.88650000 4.95350000  
H 9.81450000 5.31470000 4.35860000  
H 10.66460000 5.41360000 5.88200000  
H 11.52410000 4.96070000 4.42970000  
C 9.36420000 -0.78950000 5.90370000  
H 8.58530000 -1.12930000 5.25360000  
C 8.91230000 -0.93970000 7.36820000  
H 7.95990000 -1.42640000 7.39960000  
H 9.62980000 -1.52500000 7.90450000  
H 8.83320000 0.02780000 7.81820000  
C 10.63250000 -1.63080000 5.66880000  
H 11.08070000 -1.34840000 4.73920000  
H 11.32600000 -1.46040000 6.46560000  
H 10.37170000 -2.66820000 5.63860000  
O 8.87580000 9.47560000 6.29530000  
C 10.30280000 9.53540000 6.22430000  
H 10.72290000 9.06410000 7.08810000  
H 10.63760000 9.02900000 5.34330000  
C 10.75290000 11.00730000 6.17280000  
H 10.37050000 11.52730000 7.02620000  
H 10.37900000 11.46360000 5.28000000  
O 12.18150000 11.06920000 6.17750000  
H 12.46240000 11.98720000 6.18730000  
H 6.84710000 4.10850000 6.38560000  
H 5.41580000 4.75950000 4.69770000
